# Supplementary material
Source: publisher site journal article supplement (https://www.degruyterbrill.com/publication/isbn/9783110645743/downloadAsset/9783110645743_Testmaterialien_KT-RUS.zip)
Supplement: Supplementary file 1 [file Werthmann_et_al_2020_KT-RUS_Bewertungbogen_auf_deu.pdf › Werthmann_KT-RUS/Werthmann_et_al_2020_KT-RUS_Bewertungbogen_auf_deu.pdf]

Antonina Werthmann, Natalia Gagarina, Katrin Lindner

# **Sprachentwicklungstest zum Kasus bei den bilingualen Vorschulkindern: Sprachstand Russisch (KT-RUS)**

## **Bewertungsbogen**

|                                      |       |
|--------------------------------------|-------|
| Code des Probanden                   | _____ |
| Geburtsdatum                         | _____ |
| Geschlecht                           | _____ |
| Kontaktzeit zu L2 (in Monaten)       | _____ |
| Alter zum Testzeitpunkt (in Monaten) | _____ |
| Code des Versuchsleiters             | _____ |
| Datum der Testdurchführung           | _____ |
| Ort der Testdurchführung             | _____ |
| Name der Audiodatei                  | _____ |
| Name der Transkriptionsdatei         | _____ |

| Bild   | Phrasenstruktur                          | Antwort* | Bewertung der realisierten Struktur** | Bemerkungen |
|--------|------------------------------------------|----------|---------------------------------------|-------------|
| Bild 1 | NP <sub>AKK</sub>                        |          |                                       |             |
| Bild 2 | PP <sub>INSTR</sub>                      |          |                                       |             |
| Bild 3 | NP <sub>GEN</sub>   NP <sub>AKK</sub>    |          |                                       |             |
|        | NP <sub>AKK</sub>                        |          |                                       |             |
|        | NP <sub>AKK</sub>                        |          |                                       |             |
|        | NP <sub>AKK</sub>                        |          |                                       |             |
|        | NP <sub>AKK</sub>                        |          |                                       |             |
|        | NP <sub>DAT</sub>                        |          |                                       |             |
| Bild 4 | NP <sub>AKK</sub> (+ NP <sub>GEN</sub> ) |          |                                       |             |
|        | NP <sub>GEN</sub>                        |          |                                       |             |
| Bild 5 | NP <sub>AKK</sub>                        |          |                                       |             |
|        | PP <sub>INSTR</sub>                      |          |                                       |             |
| Bild 6 | NP <sub>AKK</sub>                        |          |                                       |             |
|        | PP <sub>AKK</sub>                        |          |                                       |             |

| Bild    | Phrasenstruktur                            | Antwort* | Bewertung der realisierten Struktur** | Bemerkungen |
|---------|--------------------------------------------|----------|---------------------------------------|-------------|
| Bild 7  | NP <sub>AKK</sub>                          |          |                                       |             |
|         | NP <sub>AKK</sub>                          |          |                                       |             |
|         | NP <sub>GEN</sub>   NP <sub>AKK</sub>      |          |                                       |             |
| Bild 8  | NP <sub>AKK</sub>                          |          |                                       |             |
| Bild 9  | PP <sub>DAT</sub>                          |          |                                       |             |
|         | NP <sub>AKK</sub> (+ PP <sub>INSTR</sub> ) |          |                                       |             |
|         | NP <sub>AKK</sub>                          |          |                                       |             |
|         | PP <sub>GEN</sub>                          |          |                                       |             |
|         |                                            |          |                                       |             |
| Bild 10 | NP <sub>AKK</sub>                          |          |                                       |             |
|         | PP <sub>AKK</sub>                          |          |                                       |             |
| Bild 11 | NP <sub>AKK</sub>                          |          |                                       |             |
|         | NP <sub>INSTR</sub>                        |          |                                       |             |
| Bild 12 | PP <sub>AKK</sub>                          |          |                                       |             |
| Bild 13 | PP <sub>INSTR</sub>   PP <sub>AKK</sub>    |          |                                       |             |
| Bild 14 | PP <sub>AKK</sub>                          |          |                                       |             |

| Bild                                                         | Phrasenstruktur    | Antwort* | Bewertung der realisierten Struktur** | Bemerkungen |
|--------------------------------------------------------------|--------------------|----------|---------------------------------------|-------------|
| Bild 15                                                      | NP <sub>AKK</sub>  |          |                                       |             |
|                                                              | PP <sub>PRÄP</sub> |          |                                       |             |
| Bild 16                                                      | PP <sub>AKK</sub>  |          |                                       |             |
| Bild 17                                                      | PP <sub>PRÄP</sub> |          |                                       |             |
|                                                              | PP <sub>PRÄP</sub> |          |                                       |             |
| Bild 18                                                      | PP <sub>PRÄP</sub> |          |                                       |             |
|                                                              | NP <sub>GEN</sub>  |          |                                       |             |
| Gesamtzahl der zielsprachlich realisierten NP-/PP-Strukturen |                    |          |                                       | ___/36      |

\* Die Phrasenstrukturen in den Antworten können je nach dem Kontext variieren.

\*\* Vorschlag zur Bewertung der realisierten Struktur: zielsprachlich (zs), nicht zielsprachlich (nzs), nicht versprachlicht (nv), deiktische Substitution (ds, z. B. *вот это* ,das da‘, *здесь* ,hier‘, *мам* ,da‘, *туда* ,dahin‘ statt z. B. *ведько* ,einen Eimer‘, *под столом* ,unter dem Tisch‘, *в дыру* ,ins Loch‘). Ferner kann der Typ der nicht zielsprachlichen NP-/PP-Realisierung notiert werden, z. B. Ersetzung (ERS) – etwa bei Nominativ für Akkusativ –, Artikelauslassung (ART0), Ersetzung der Präposition in der PP (ERS PRP) oder ihre Auslassung (PRP0).
