# Supplementary material
Source: publisher site journal article supplement (https://www.degruyterbrill.com/publication/isbn/9783110645743/downloadAsset/9783110645743_Testmaterialien_KT-RUS.zip)
Supplement: Supplementary file 2 [file Werthmann_et_al_2020_KT-RUS_Bewertungbogen_auf_rus.pdf › Werthmann_KT-RUS/Werthmann_et_al_2020_KT-RUS_Bewertungbogen_auf_rus.pdf]

Антонина Вертманн, Наталья В. Гагарина, Катрин Линднер

# Тест по усвоению падежа для билингвальных детей дошкольного возраста: Русский язык (KT-RUS)

## Оценочный лист

Код ребёнка:

---

Дата рождения:

---

Пол:

---

Длительность контакта со 2-ым  
языком (в месяцах):

---

Возраст на день тестирования (в  
месяцах)

---

Код экспериментатора:

---

Дата тестирования:

---

Место тестирования:

---

Имя аудиофайла:

---

Имя транскрипционного файла:

---

| Рис.   | Беспредложная (NP)/предложная (PP) конструкция | Ответ* | Оценка реализации беспредложной (NP)/предложной (PP) конструкции** | Примечание |
|--------|------------------------------------------------|--------|--------------------------------------------------------------------|------------|
| Рис. 1 | NP <sub>вин.п.</sub>                           |        |                                                                    |            |
| Рис. 2 | PP <sub>тв.п.</sub>                            |        |                                                                    |            |
| Рис. 3 | NP <sub>род.п.</sub>   NP <sub>вин.п.</sub>    |        |                                                                    |            |
|        | NP <sub>вин.п.</sub>                           |        |                                                                    |            |
|        | NP <sub>вин.п.</sub>                           |        |                                                                    |            |
|        | NP <sub>вин.п.</sub>                           |        |                                                                    |            |
|        | NP <sub>вин.п.</sub>                           |        |                                                                    |            |
|        | NP <sub>дат.п.</sub>                           |        |                                                                    |            |
| Рис. 4 | NP <sub>вин.п.</sub> (+ NP <sub>род.п.</sub> ) |        |                                                                    |            |
|        | NP <sub>род.п.</sub>                           |        |                                                                    |            |
| Рис. 5 | NP <sub>вин.п.</sub>                           |        |                                                                    |            |
|        | PP <sub>тв.п.</sub>                            |        |                                                                    |            |
| Рис. 6 | NP <sub>вин.п.</sub>                           |        |                                                                    |            |
|        | PP <sub>вин.п.</sub>                           |        |                                                                    |            |

| Рис.    | Беспредложная (НР)/предложная (РР) конструкция | Ответ* | Оценка реализации беспредложной (НР)/предложной (РР) конструкции** | Примечание |
|---------|------------------------------------------------|--------|--------------------------------------------------------------------|------------|
| Рис. 7  | НР <sub>вин.п.</sub>                           |        |                                                                    |            |
|         | НР <sub>вин.п.</sub>                           |        |                                                                    |            |
|         | НР <sub>род.п.</sub>   НР <sub>вин.п.</sub>    |        |                                                                    |            |
| Рис. 8  | НР <sub>вин.п.</sub>                           |        |                                                                    |            |
| Рис. 9  | РР <sub>дат.п.</sub>                           |        |                                                                    |            |
|         | НР <sub>вин.п.</sub> (+ РР <sub>тв.п.</sub> )  |        |                                                                    |            |
|         | НР <sub>вин.п.</sub>                           |        |                                                                    |            |
|         | РР <sub>род.п.</sub>                           |        |                                                                    |            |
|         | НР <sub>вин.п.</sub>                           |        |                                                                    |            |
| Рис. 10 | НР <sub>вин.п.</sub>                           |        |                                                                    |            |
|         | РР <sub>вин.п.</sub>                           |        |                                                                    |            |
| Рис. 11 | НР <sub>вин.п.</sub>                           |        |                                                                    |            |
|         | НР <sub>тв.п.</sub>                            |        |                                                                    |            |
| Рис. 12 | РР <sub>вин.п.</sub>                           |        |                                                                    |            |
| Рис. 13 | РР <sub>тв.п.</sub>   РР <sub>вин.п.</sub>     |        |                                                                    |            |
| Рис. 14 | РР <sub>вин.п.</sub>                           |        |                                                                    |            |

| Рис.                                                                                | Беспредложная (NP)/предложная (PP) конструкция | Ответ* | Оценка реализации беспредложной (NP)/предложной (PP) конструкции** | Примечание |
|-------------------------------------------------------------------------------------|------------------------------------------------|--------|--------------------------------------------------------------------|------------|
| Рис. 15                                                                             | NP <sub>вин.п.</sub>                           |        |                                                                    |            |
|                                                                                     | PP <sub>пр.п.</sub>                            |        |                                                                    |            |
| Рис. 16                                                                             | PP <sub>вин.п.</sub>                           |        |                                                                    |            |
| Рис. 17                                                                             | PP <sub>пр.п.</sub>                            |        |                                                                    |            |
|                                                                                     | PP <sub>пр.п.</sub>                            |        |                                                                    |            |
| Рис. 18                                                                             | PP <sub>пр.п.</sub>                            |        |                                                                    |            |
|                                                                                     | NP <sub>родл.</sub>                            |        |                                                                    |            |
| Общая сумма правильно реализованных беспредложных и предложных конструкций (NP, PP) |                                                |        |                                                                    | ___/36     |

\* Конструкции в ответах могут варьировать в зависимости от контекста.

\*\* Пример оценки: правильно (пр.), неправильно (непр.), замена указательным словом (ук. зам., напр.: *вот, это, здесь, там, туда* вместо *ведра, под столом, в нору*), отсутствие конструкции/ответа (*отсутств.*). Также можно определить тип ошибки в беспредложной/предложной конструкции, напр. замена падежа (*падеж. зам.*) при употреблении именительного падежа вместо винительного, опущение предлога в предложной конструкции (*предл. 0*) или замена предлога (*предл. зам.*).
