# Supplementary material
Source: publisher site journal article supplement (https://www.degruyterbrill.com/publication/isbn/9783110645743/downloadAsset/9783110645743_Testmaterialien_KT-RUS.zip)
Supplement: Supplementary file 3 [file Werthmann_et_al_2020_KT-RUS_Bildergeschichte.pdf › Werthmann_KT-RUS/Werthmann_et_al_2020_KT-RUS_Bildergeschichte.pdf]

Antonina Werthmann, Natalia Gagarina, Katrin Lindner

# Sprachentwicklungstest zum Kasus bei den bilingualen Vorschulkindern: Sprachstand Russisch (KT-RUS)

## Bildergeschichte

### **История о лисе, которая хотела поиграть с зайцем**

„Geschichte vom Fuchs, der mit dem Hasen  
spielen wollte“

gemalt von Jennipher Mathieu

Open Access. © 2020 Antonina Werthmann, Natalia Gagarina, Katrin Lindner, publiziert von De Gruyter.

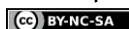

Dieses Werk ist lizenziert unter der Creative Commons Attribution-NonCommercial-ShareAlike 4.0 Lizenz.

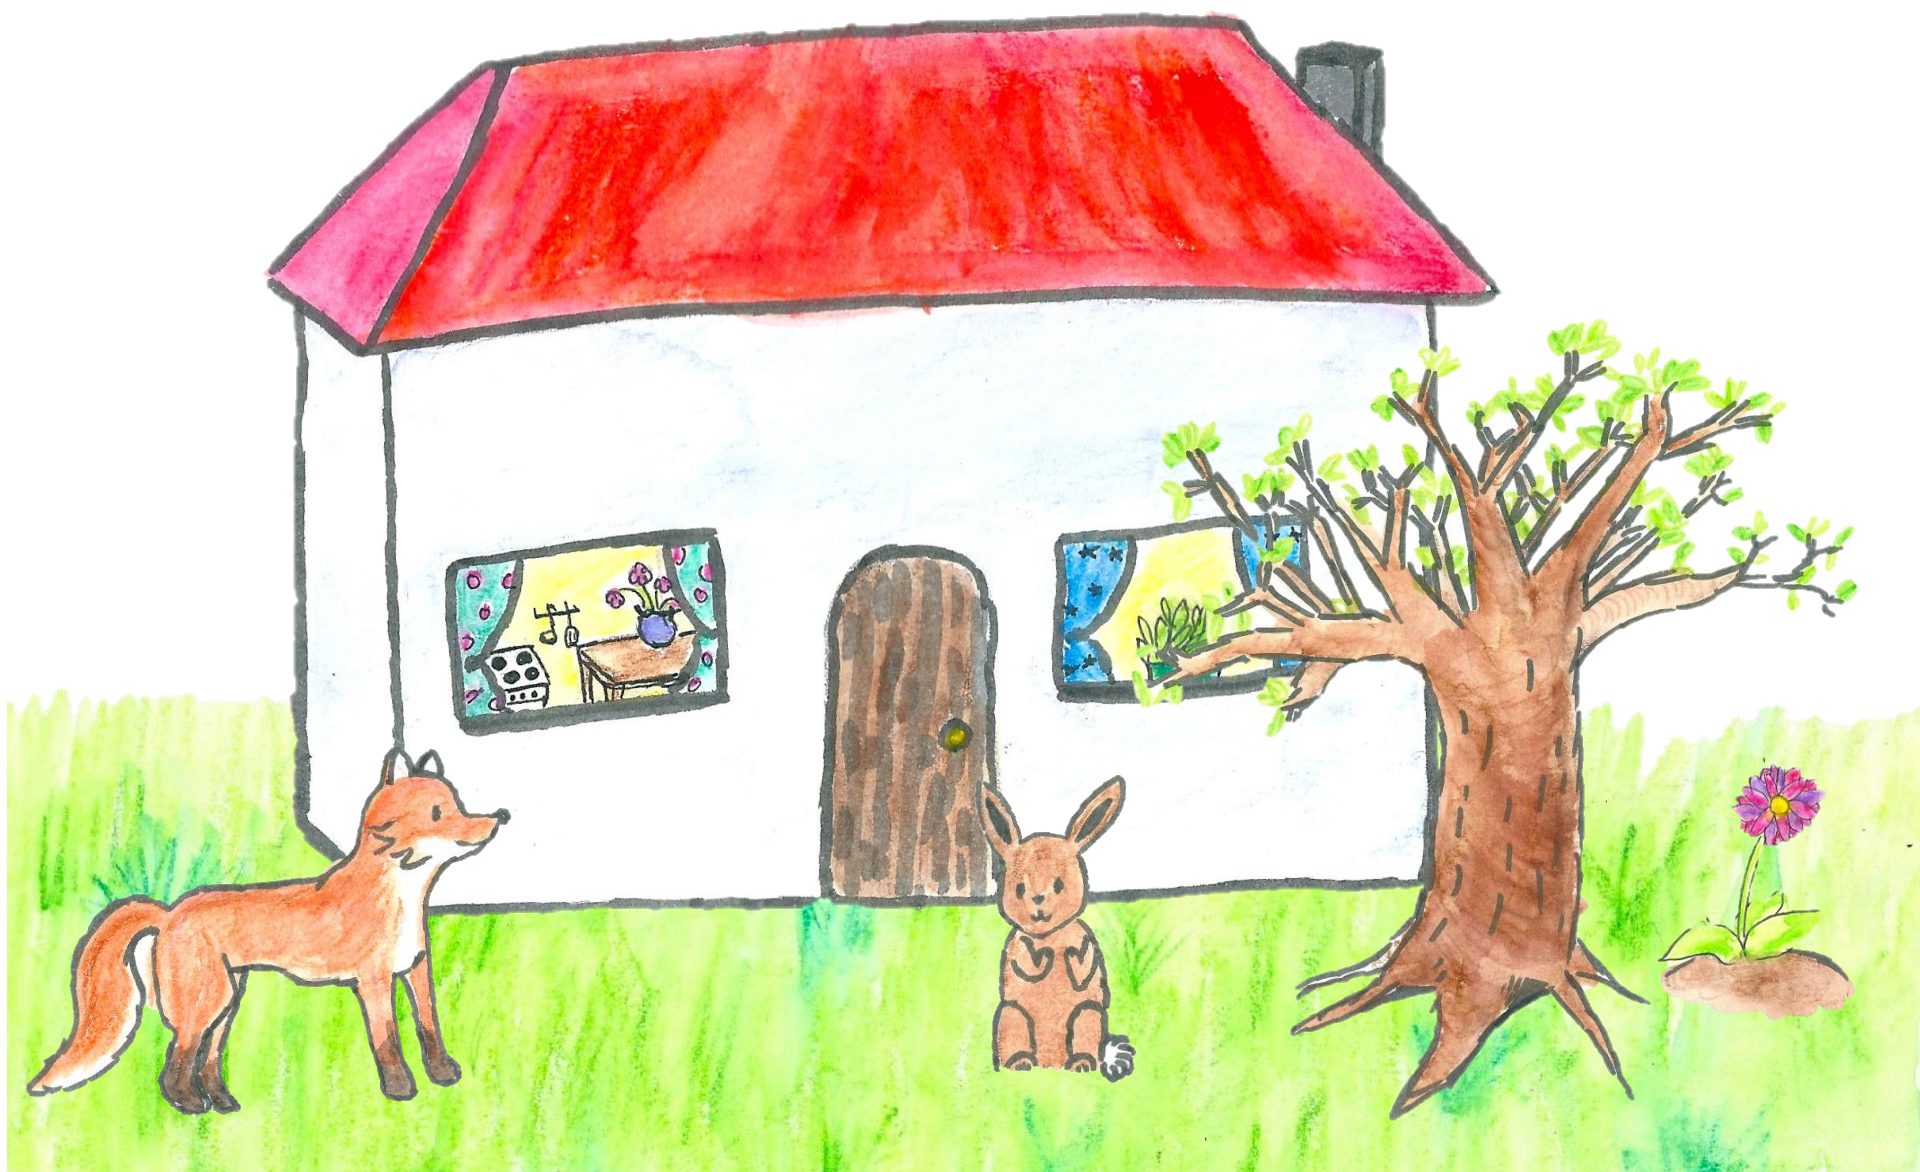

VL: Что здесь происходит? Это лиса, она видит ...



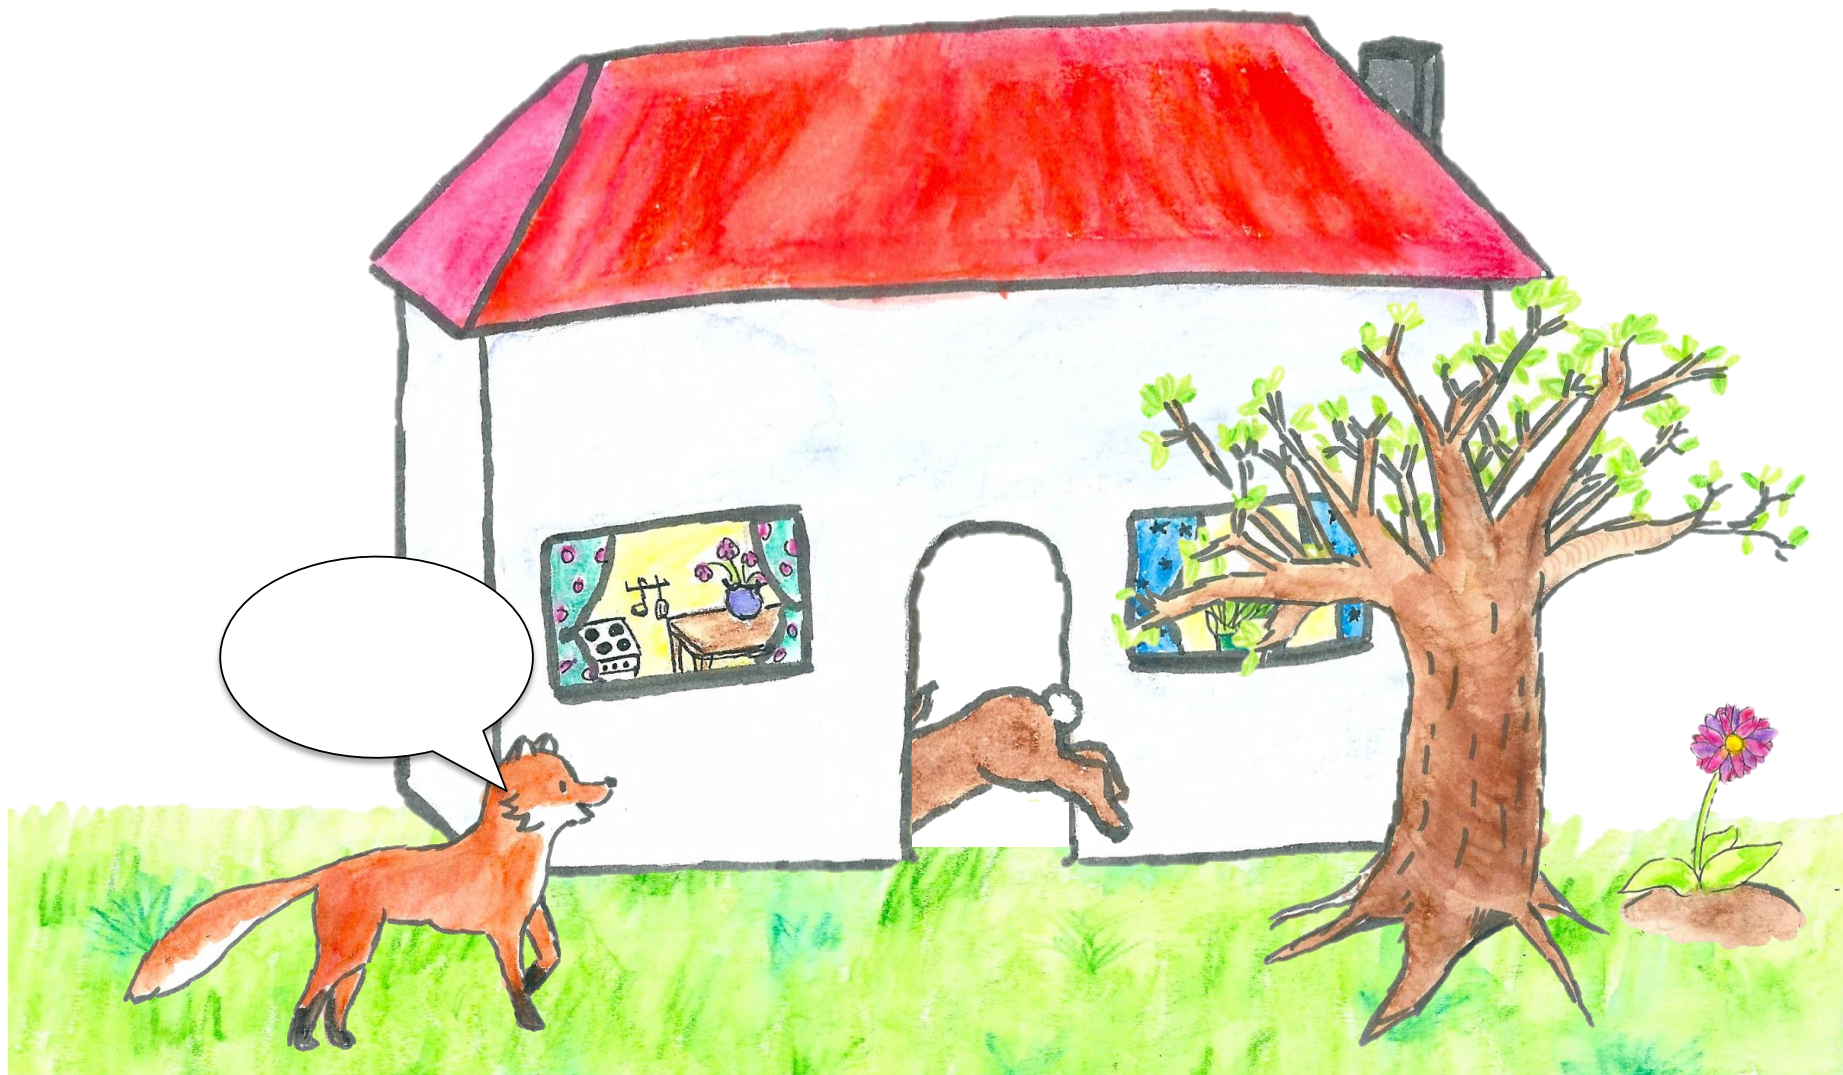

**VL:** Заяц боится лисы. Он убегает. Лиса кричит ему: «Куда ты убегаешь?» — Как ты думаешь, что хочет лиса от зайца? Она хочет поиграть ... ?

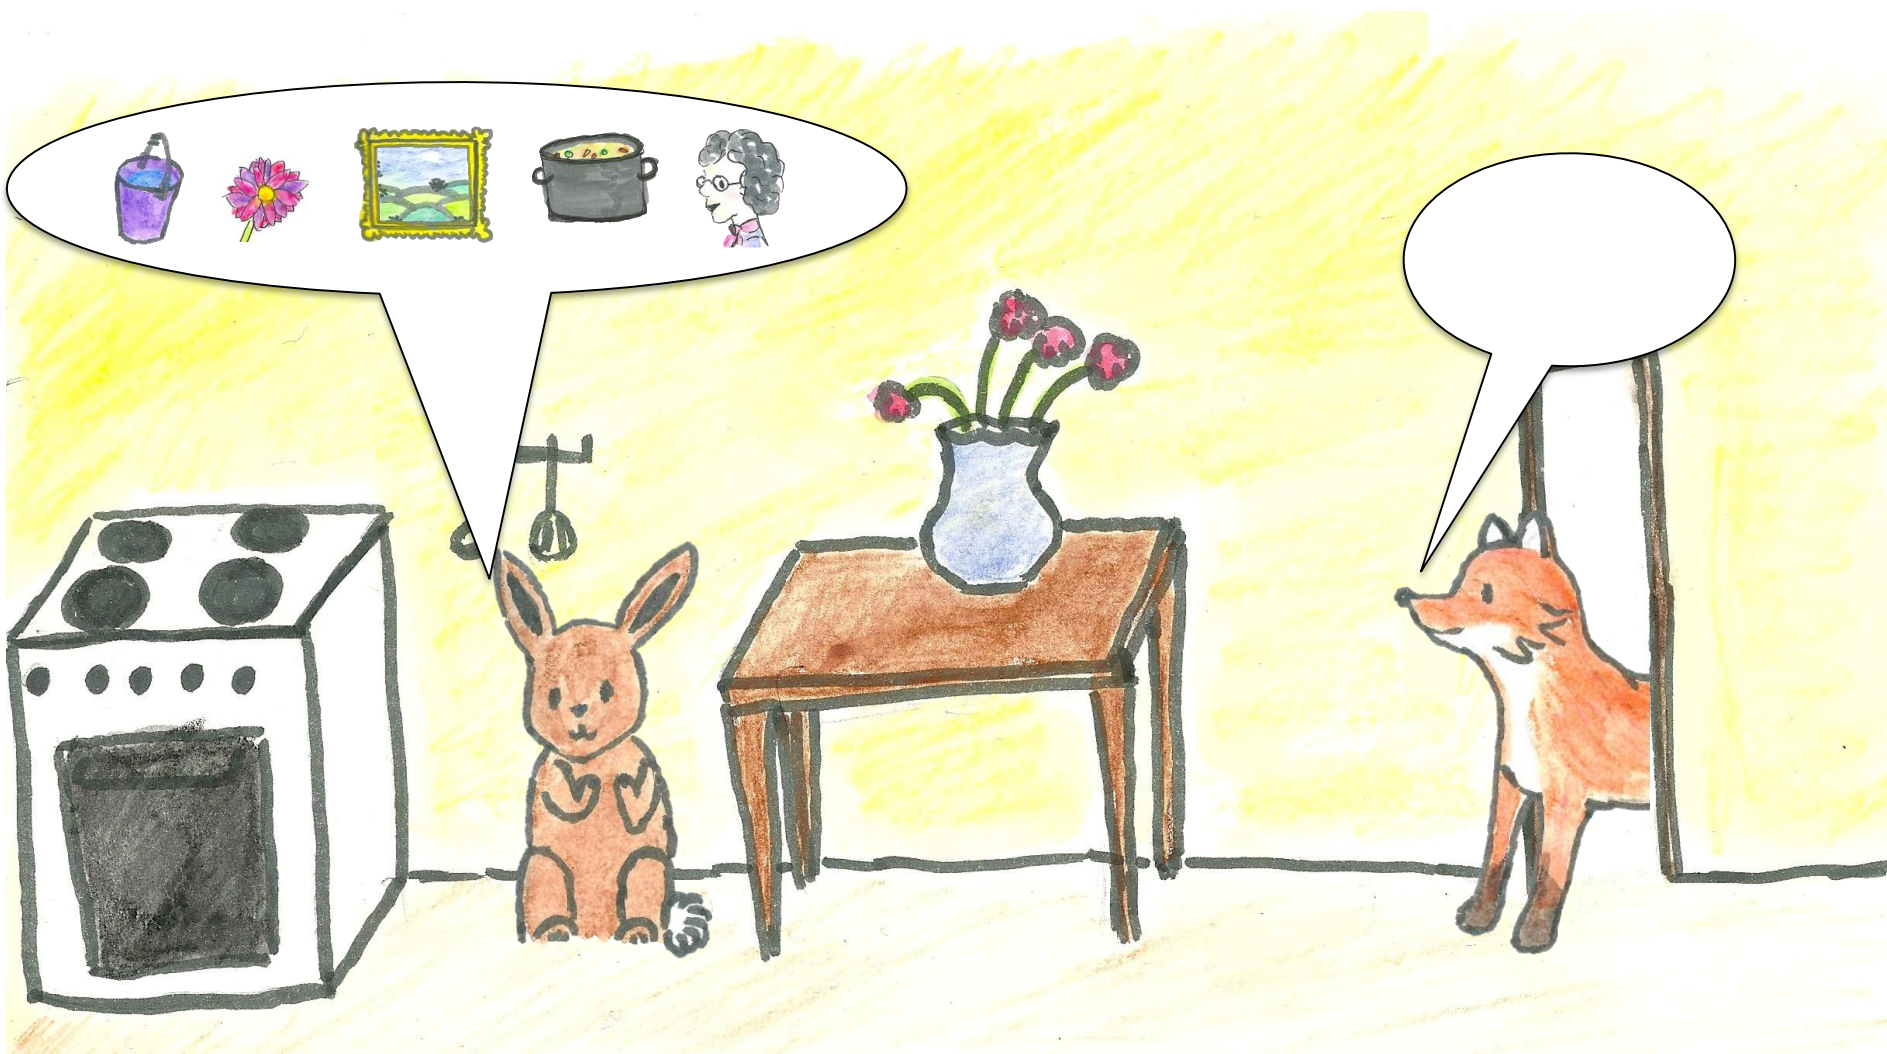

**VL:** Заяц говорит: «У меня нет времени, очень много дел. Мне надо принести ...; полить ...; повесить ...; потом мне надо сварить ... и навестить ...»

**VL:** Заяц говорит лисе: «Если ты мне поможешь, то потом мы вместе поиграем в прятки». Лиса отвечает: «Я помогу ...!»



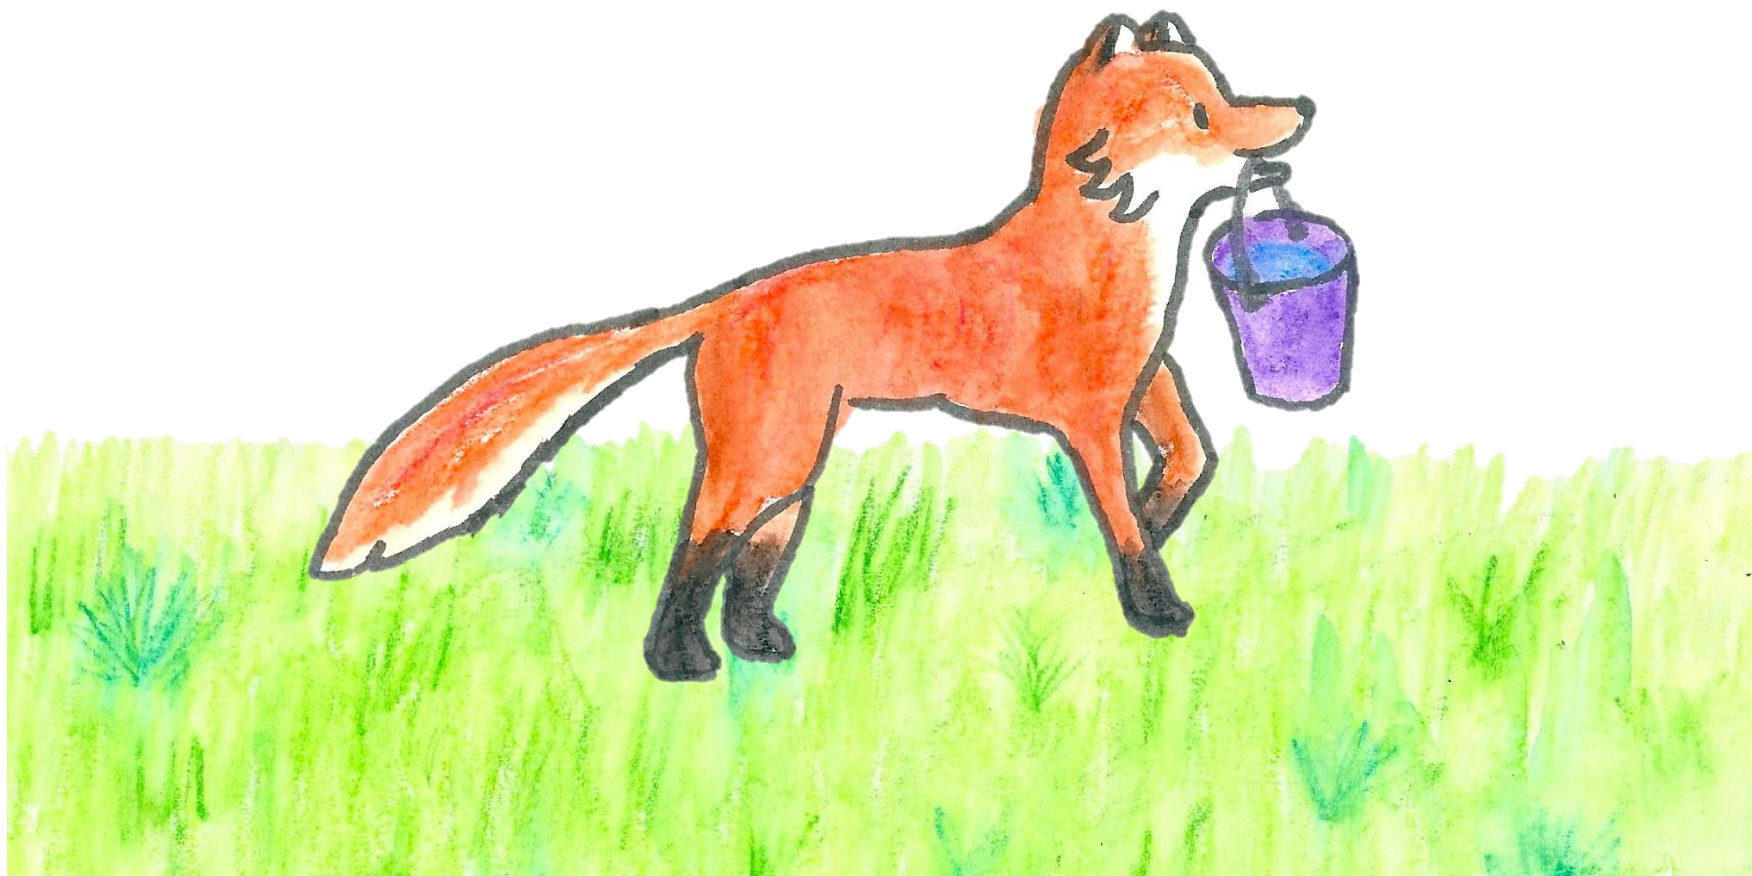

**VL:** Что происходит здесь? Лиса несёт ...

*Если ребёнок дополняет только слово «ведро» или «воду», то:*

**VL:** (Она только ведро несёт?) Лиса несёт ведро ...

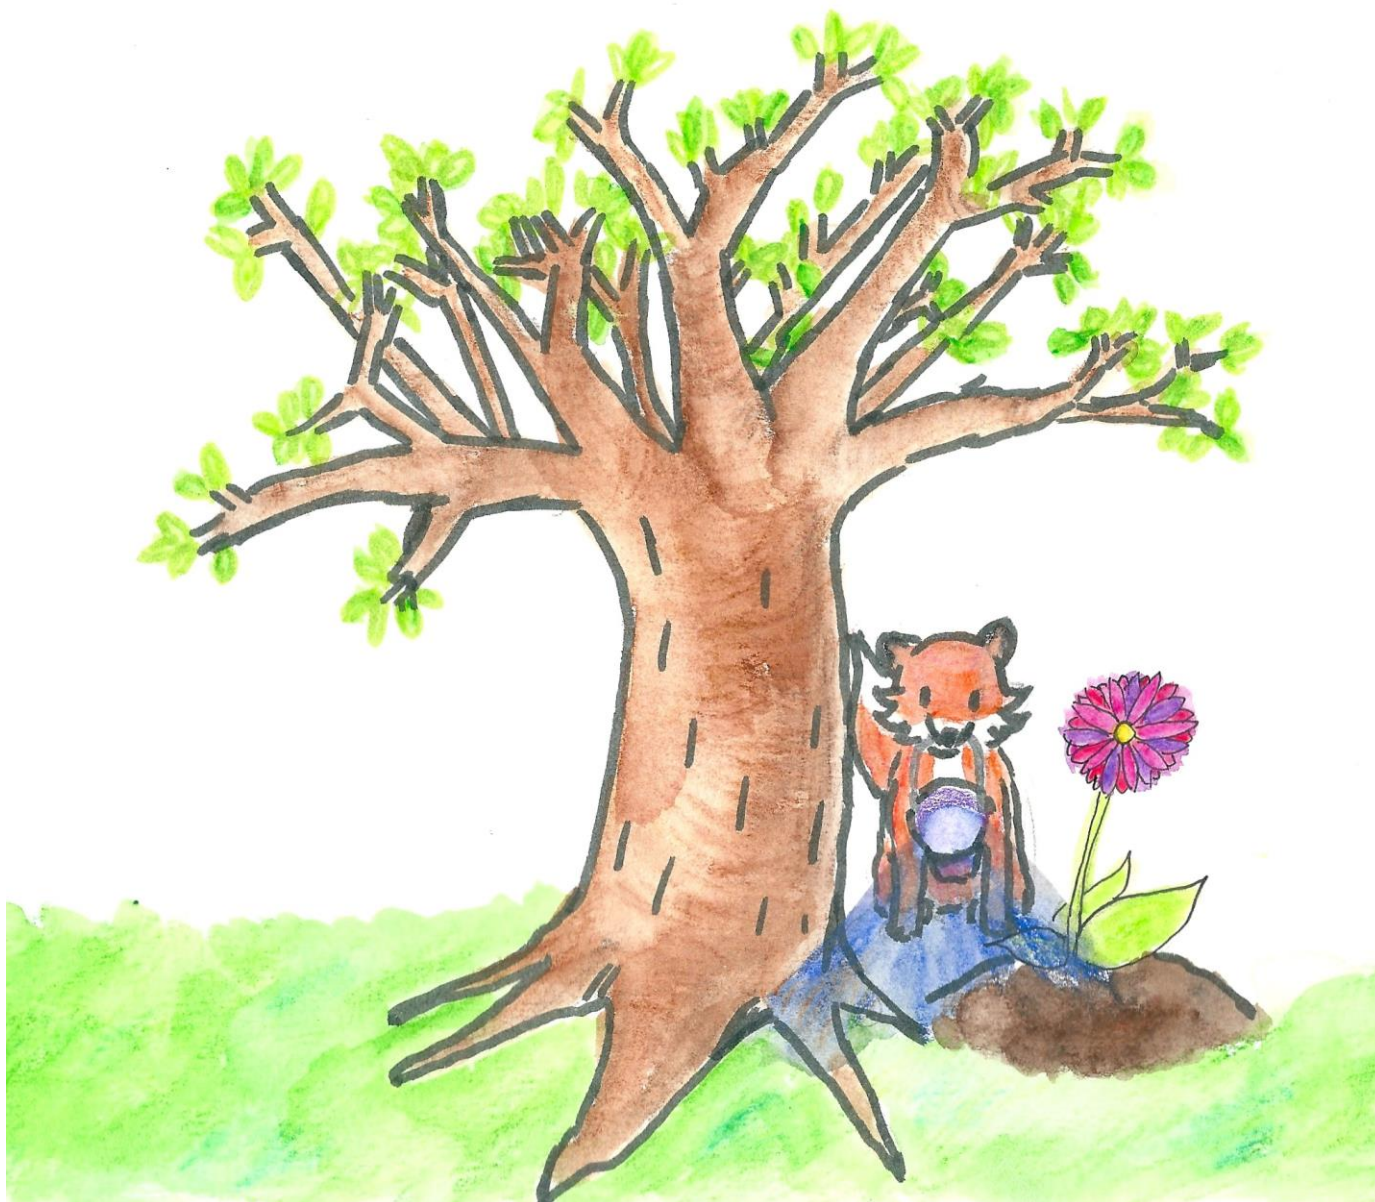

**VL:** Давай посмотрим, что же дальше происходит? Лиса поливает ...

**P:** А где растёт цветок?



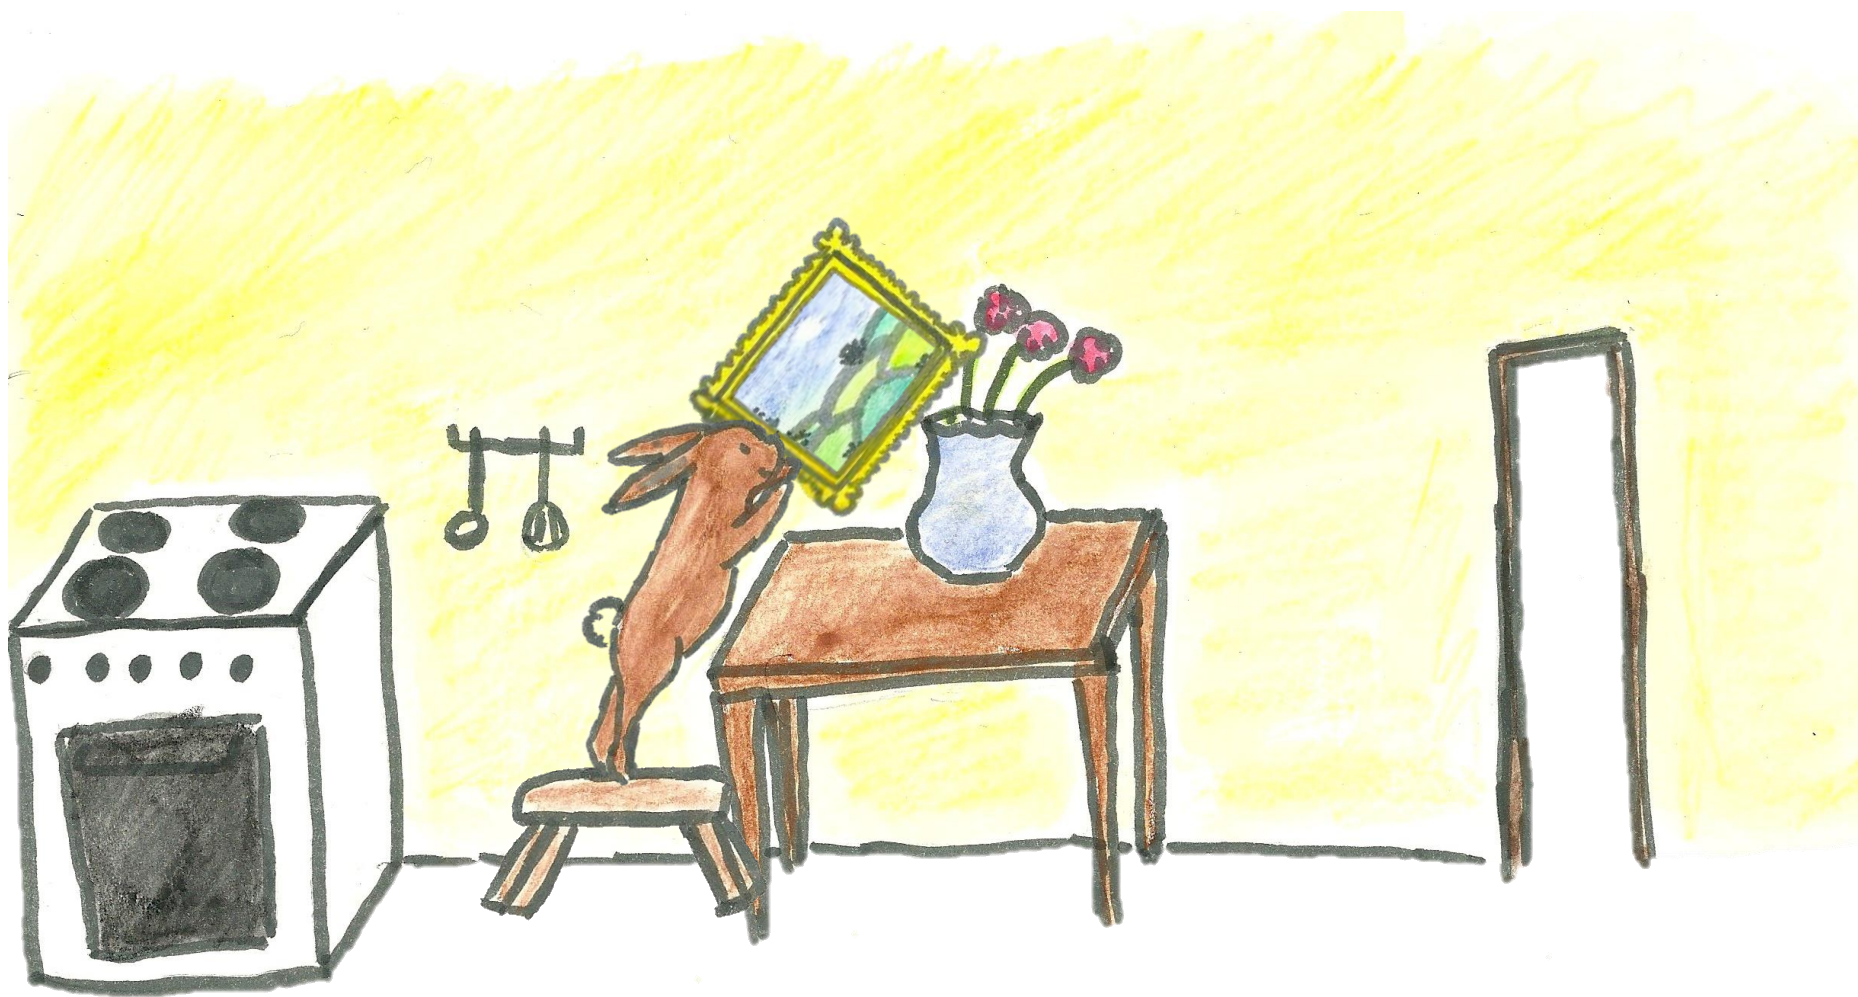

**VL:** А здесь? Заяц вешает ...

*Если ребёнок дополняет только слово «картину», то:*

**Р:** А куда он вешает картину?

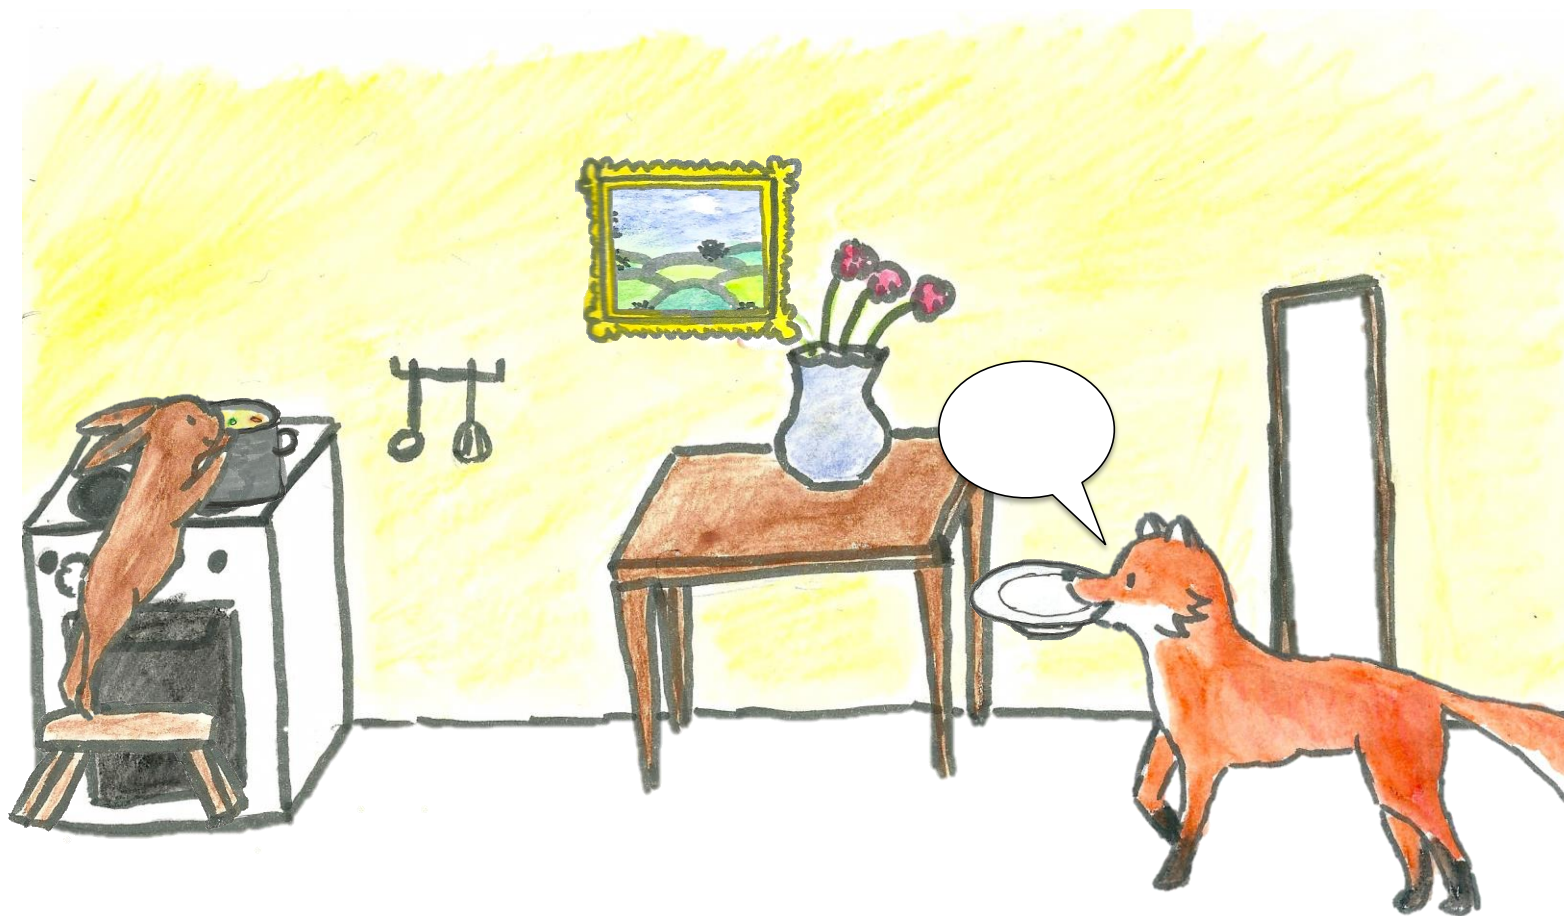

**VL:** Что здесь происходит?

**VL:** Тем временем лиса проголодалась. Что происходит дальше? (VL показывает на тарелку.)

**VL:** Как ты думаешь, что она просит у зайца поесть?



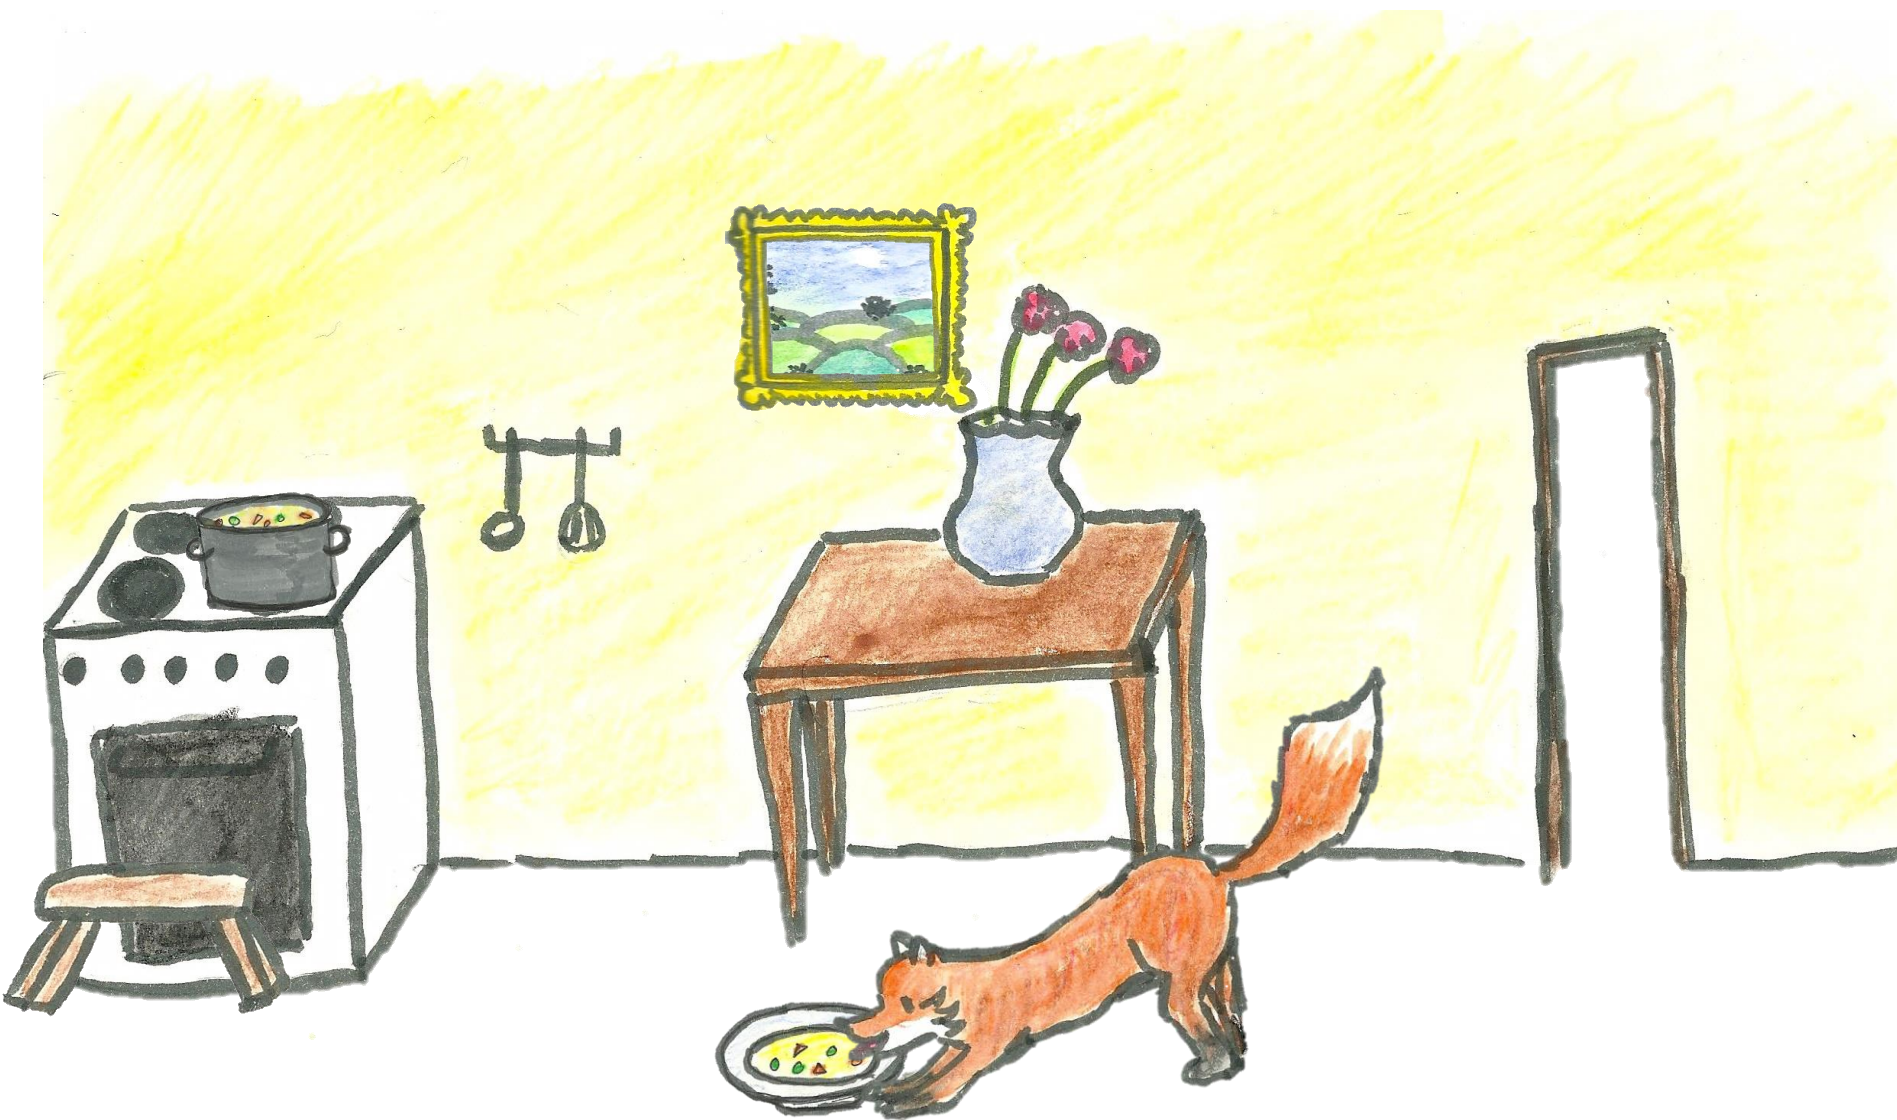

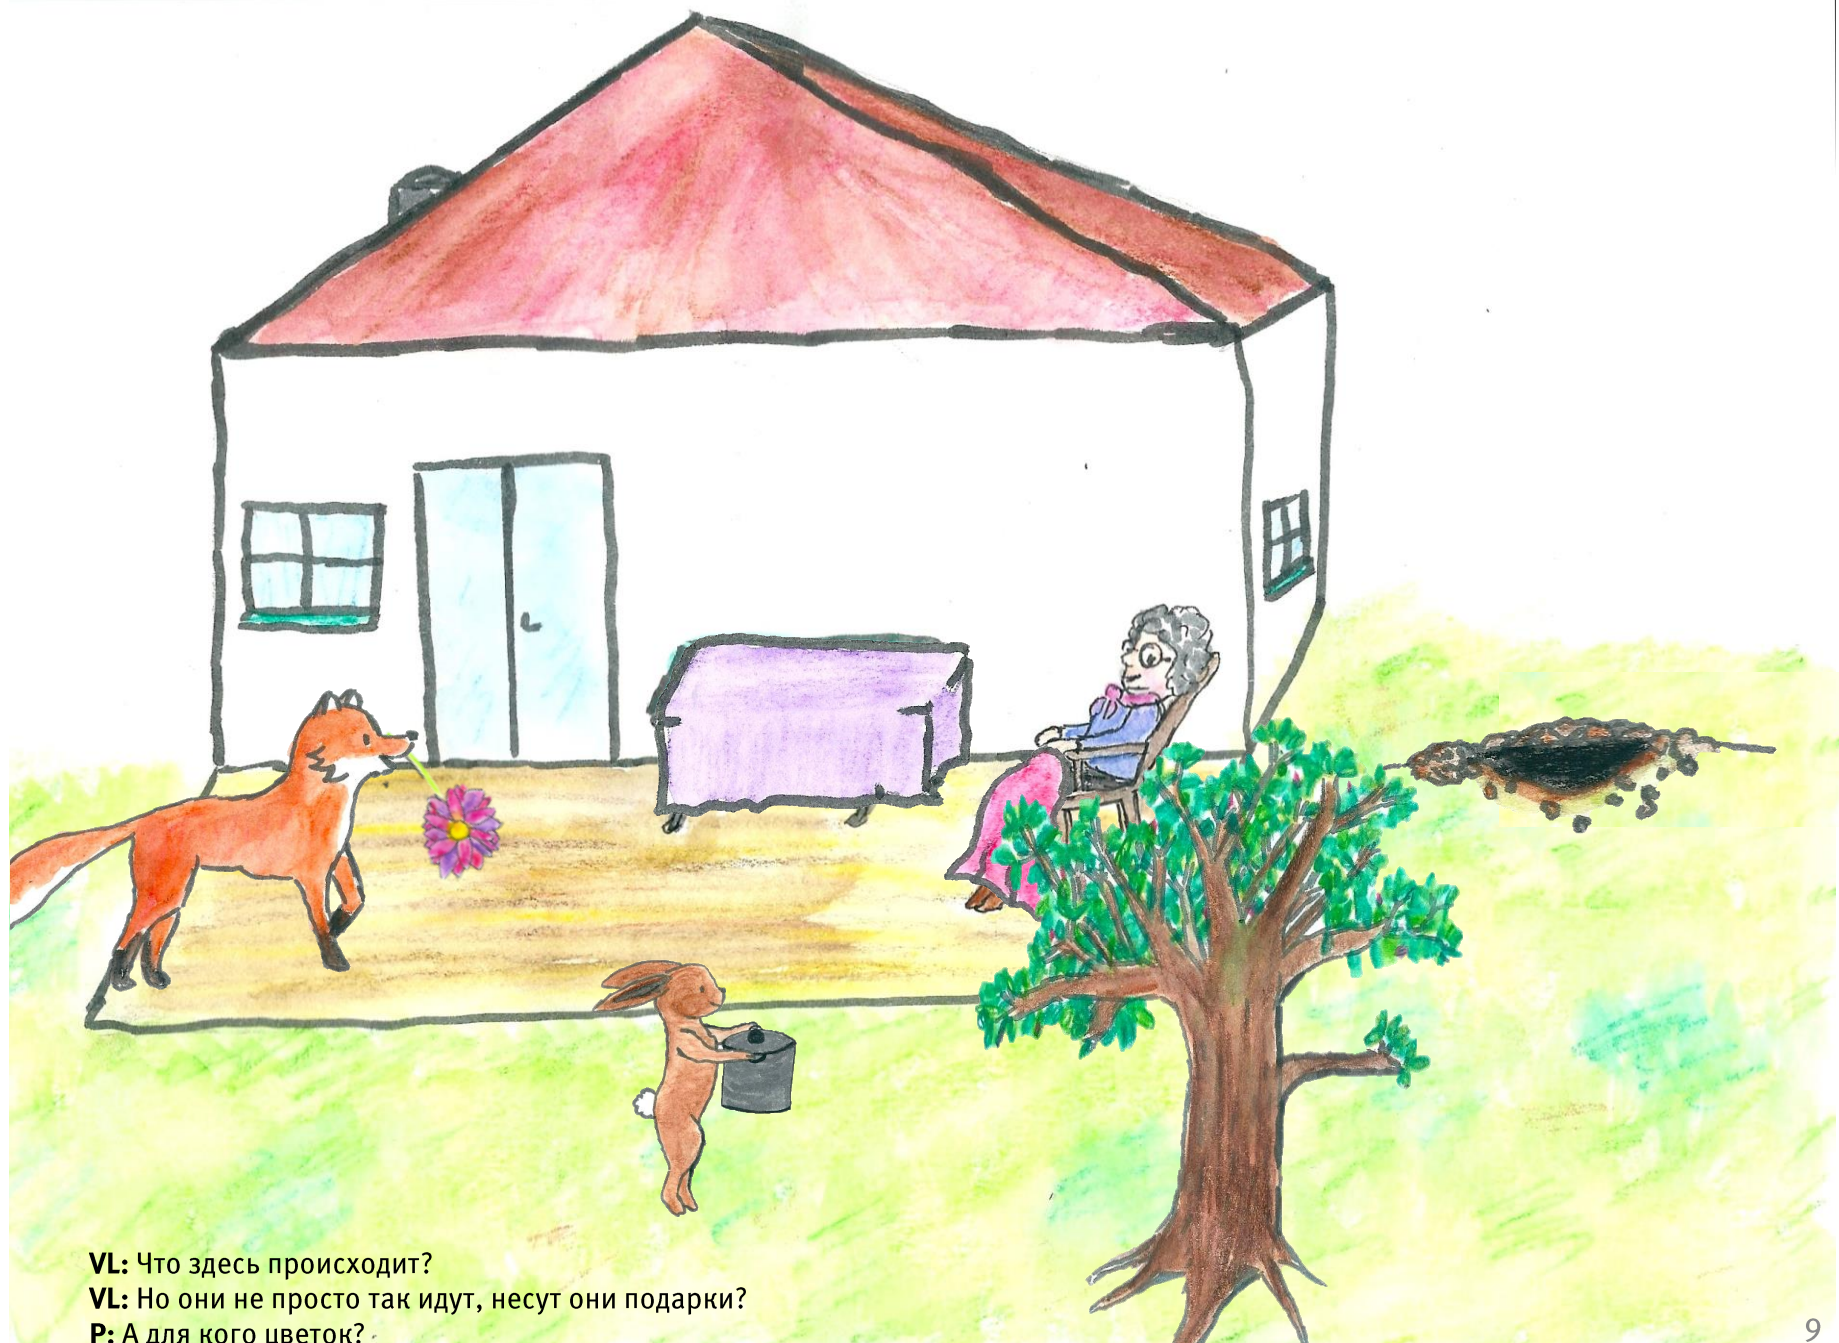

VL: Что здесь происходит?

VL: Но они не просто так идут, несут они подарки?

Р: А для кого цветок?



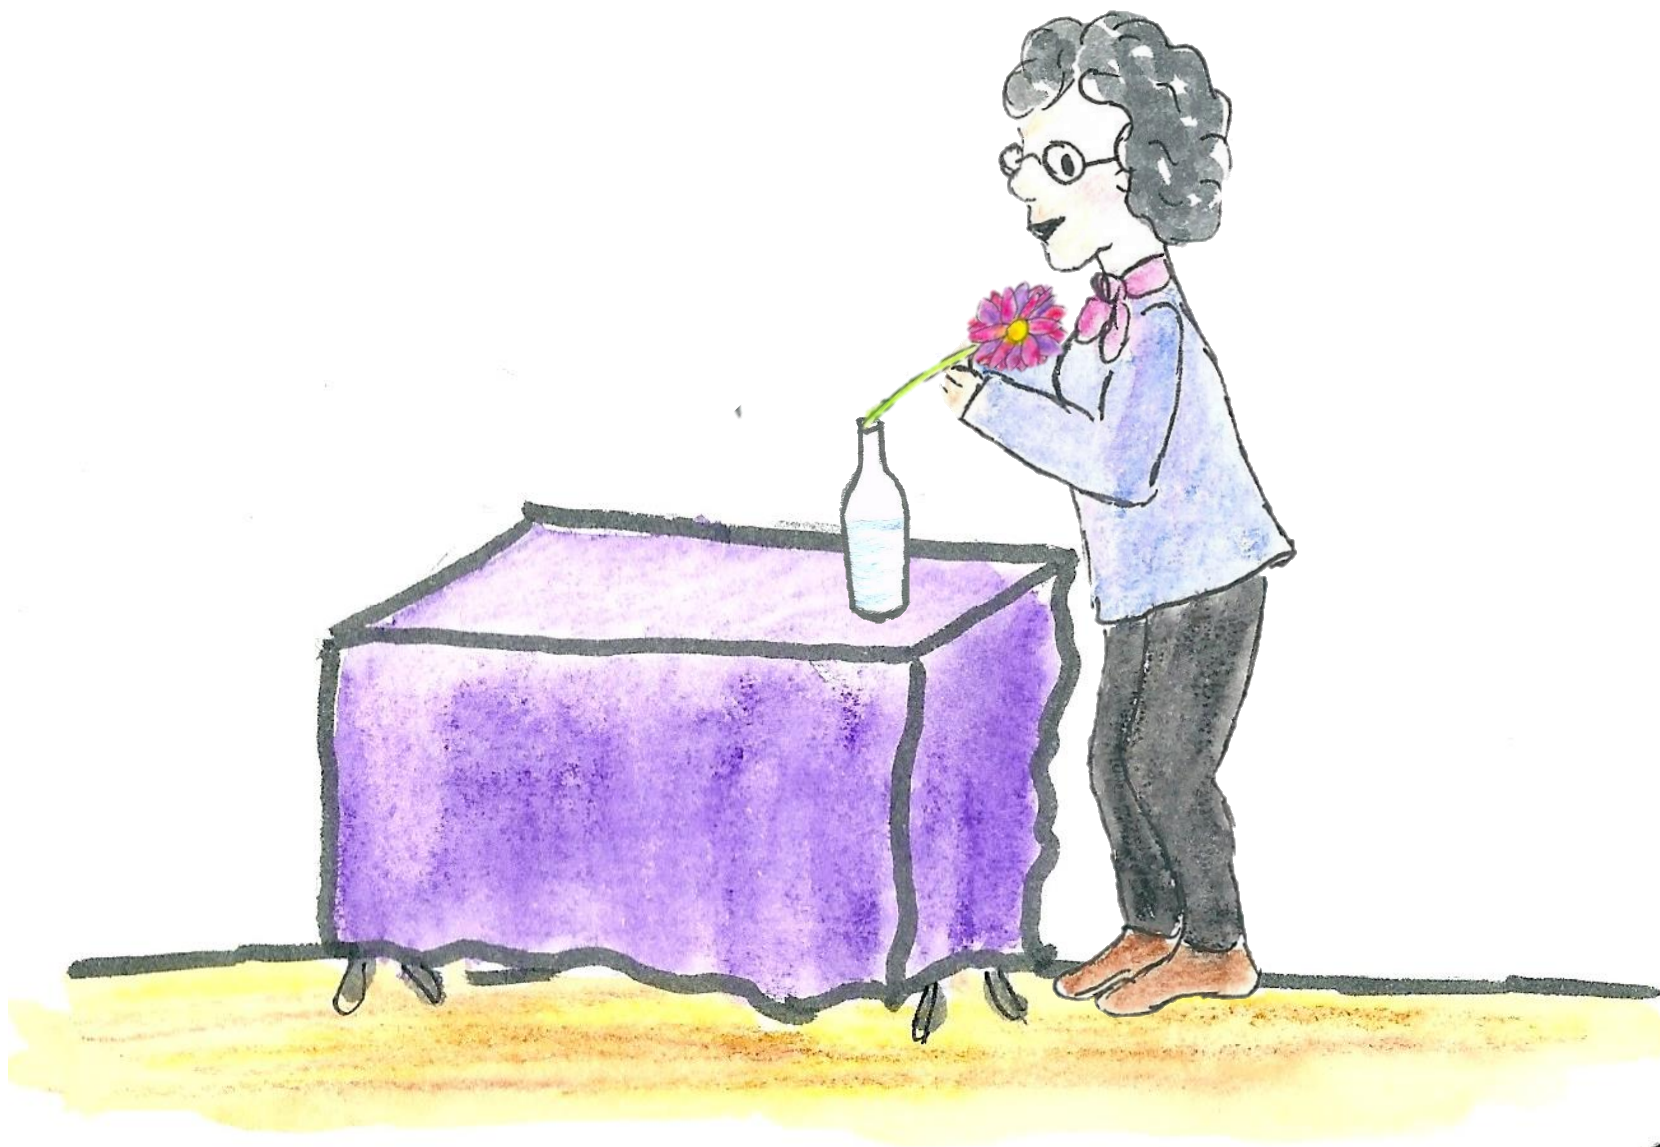

VL: Что здесь происходит?

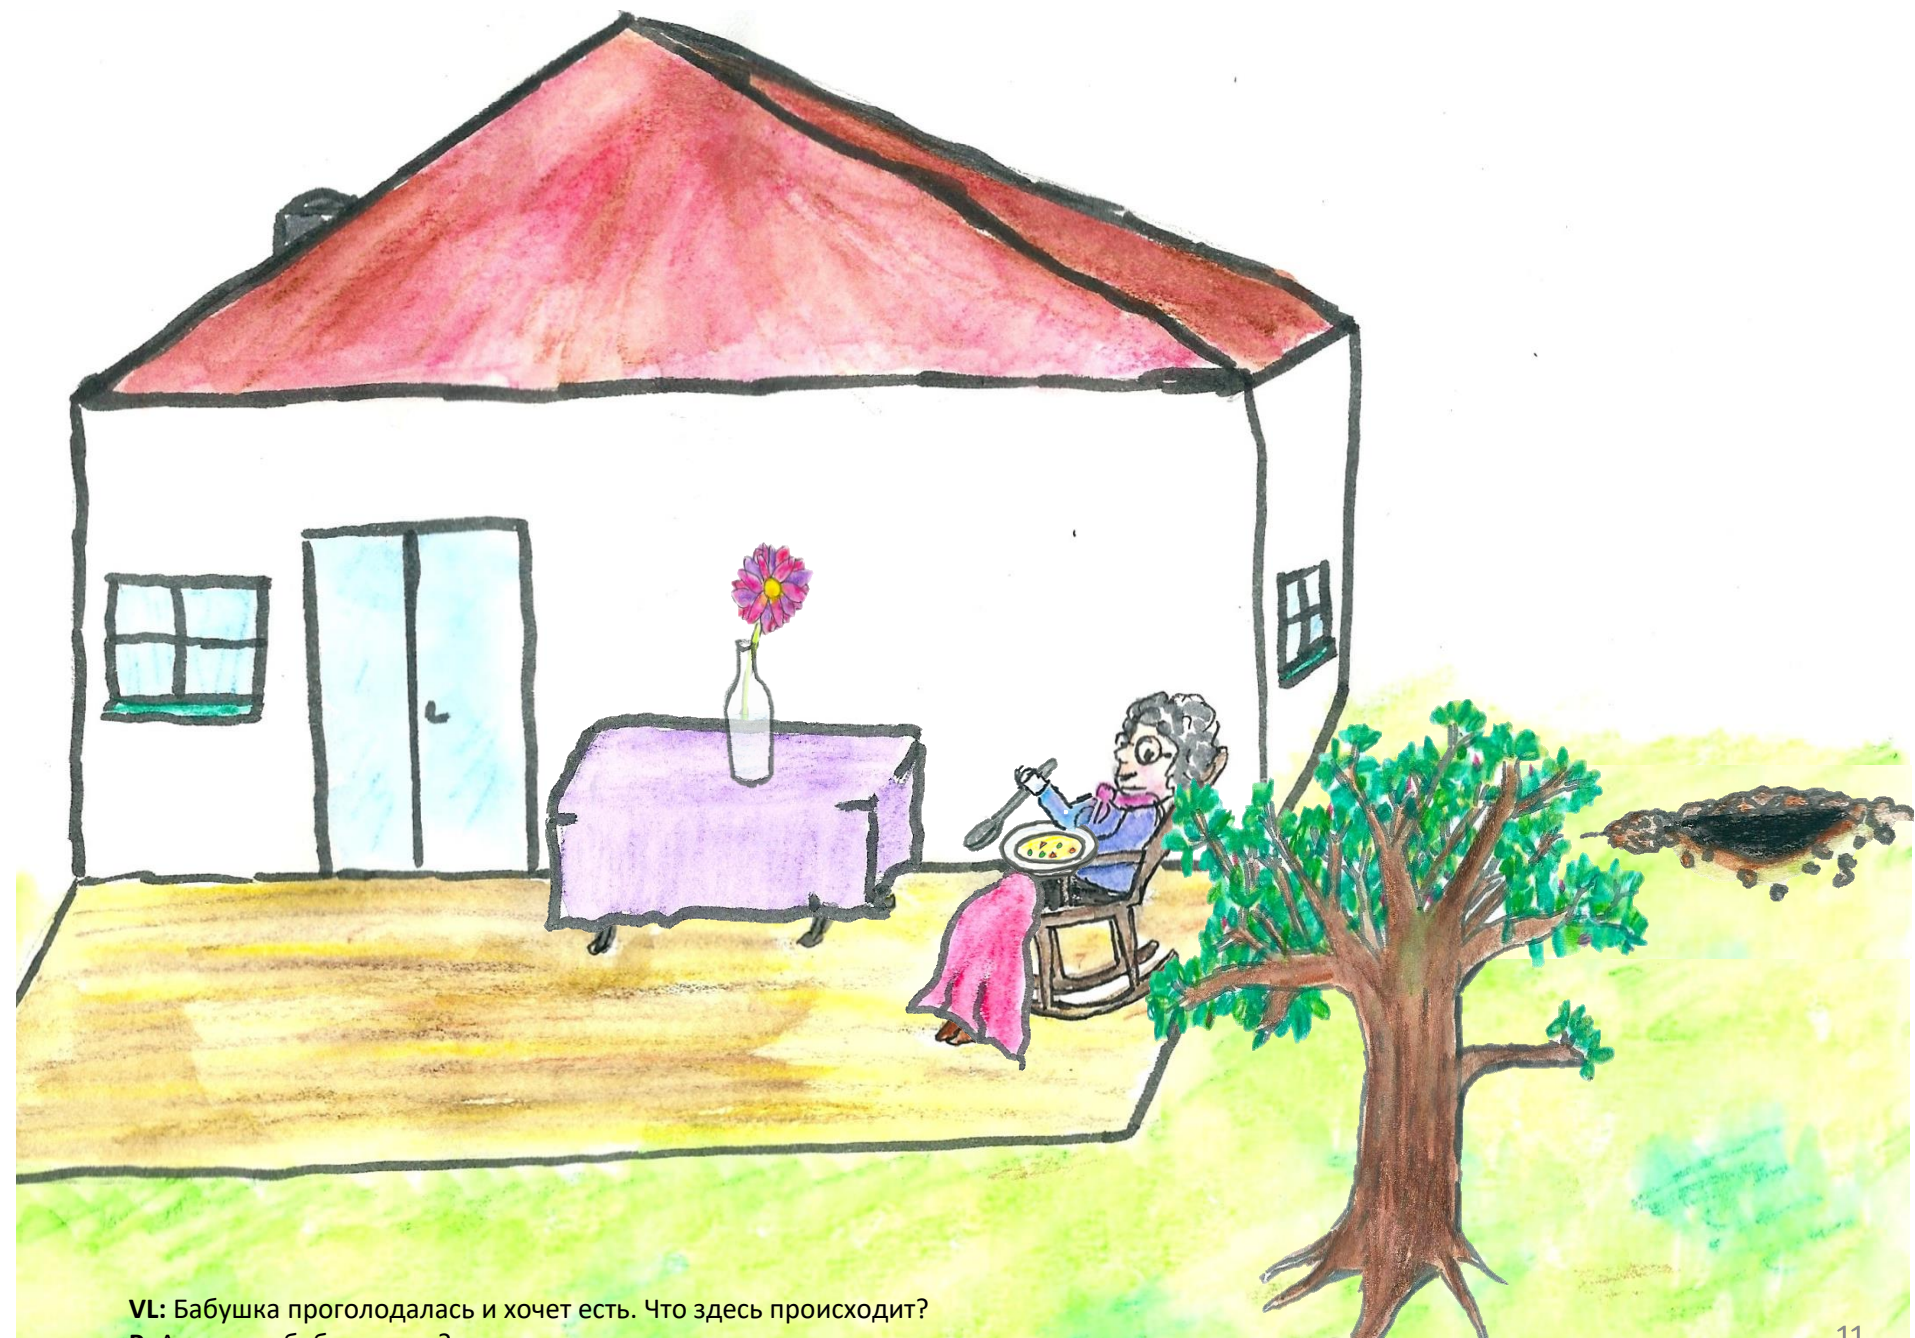

VL: Бабушка проголодалась и хочет есть. Что здесь происходит?

P: А чем ест бабушка суп?



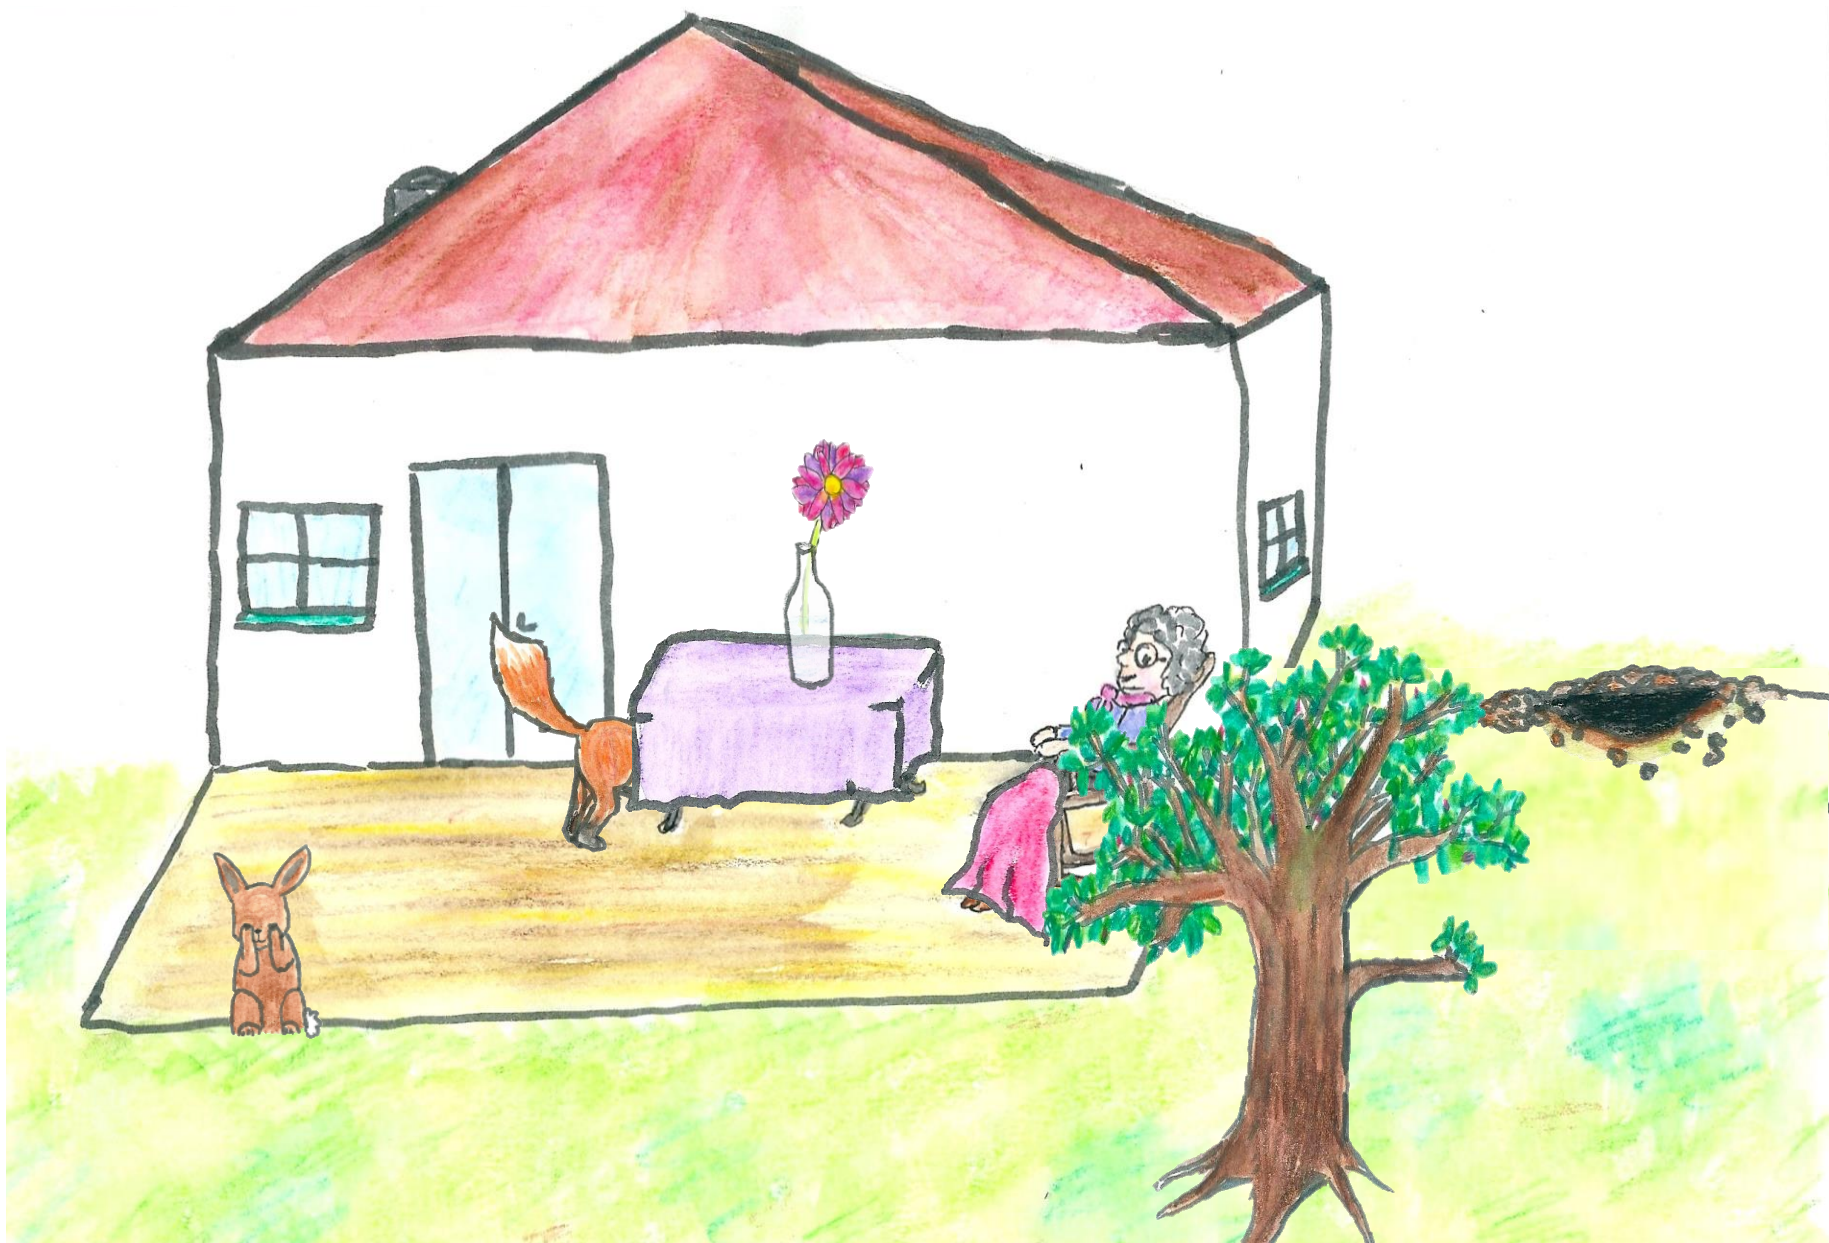

**VL:** Потом заяц говорит лисе: «Ты мне очень хорошо помогла. Теперь мы можем поиграть в прятки! Ты прячешься первой!» Что происходит дальше?



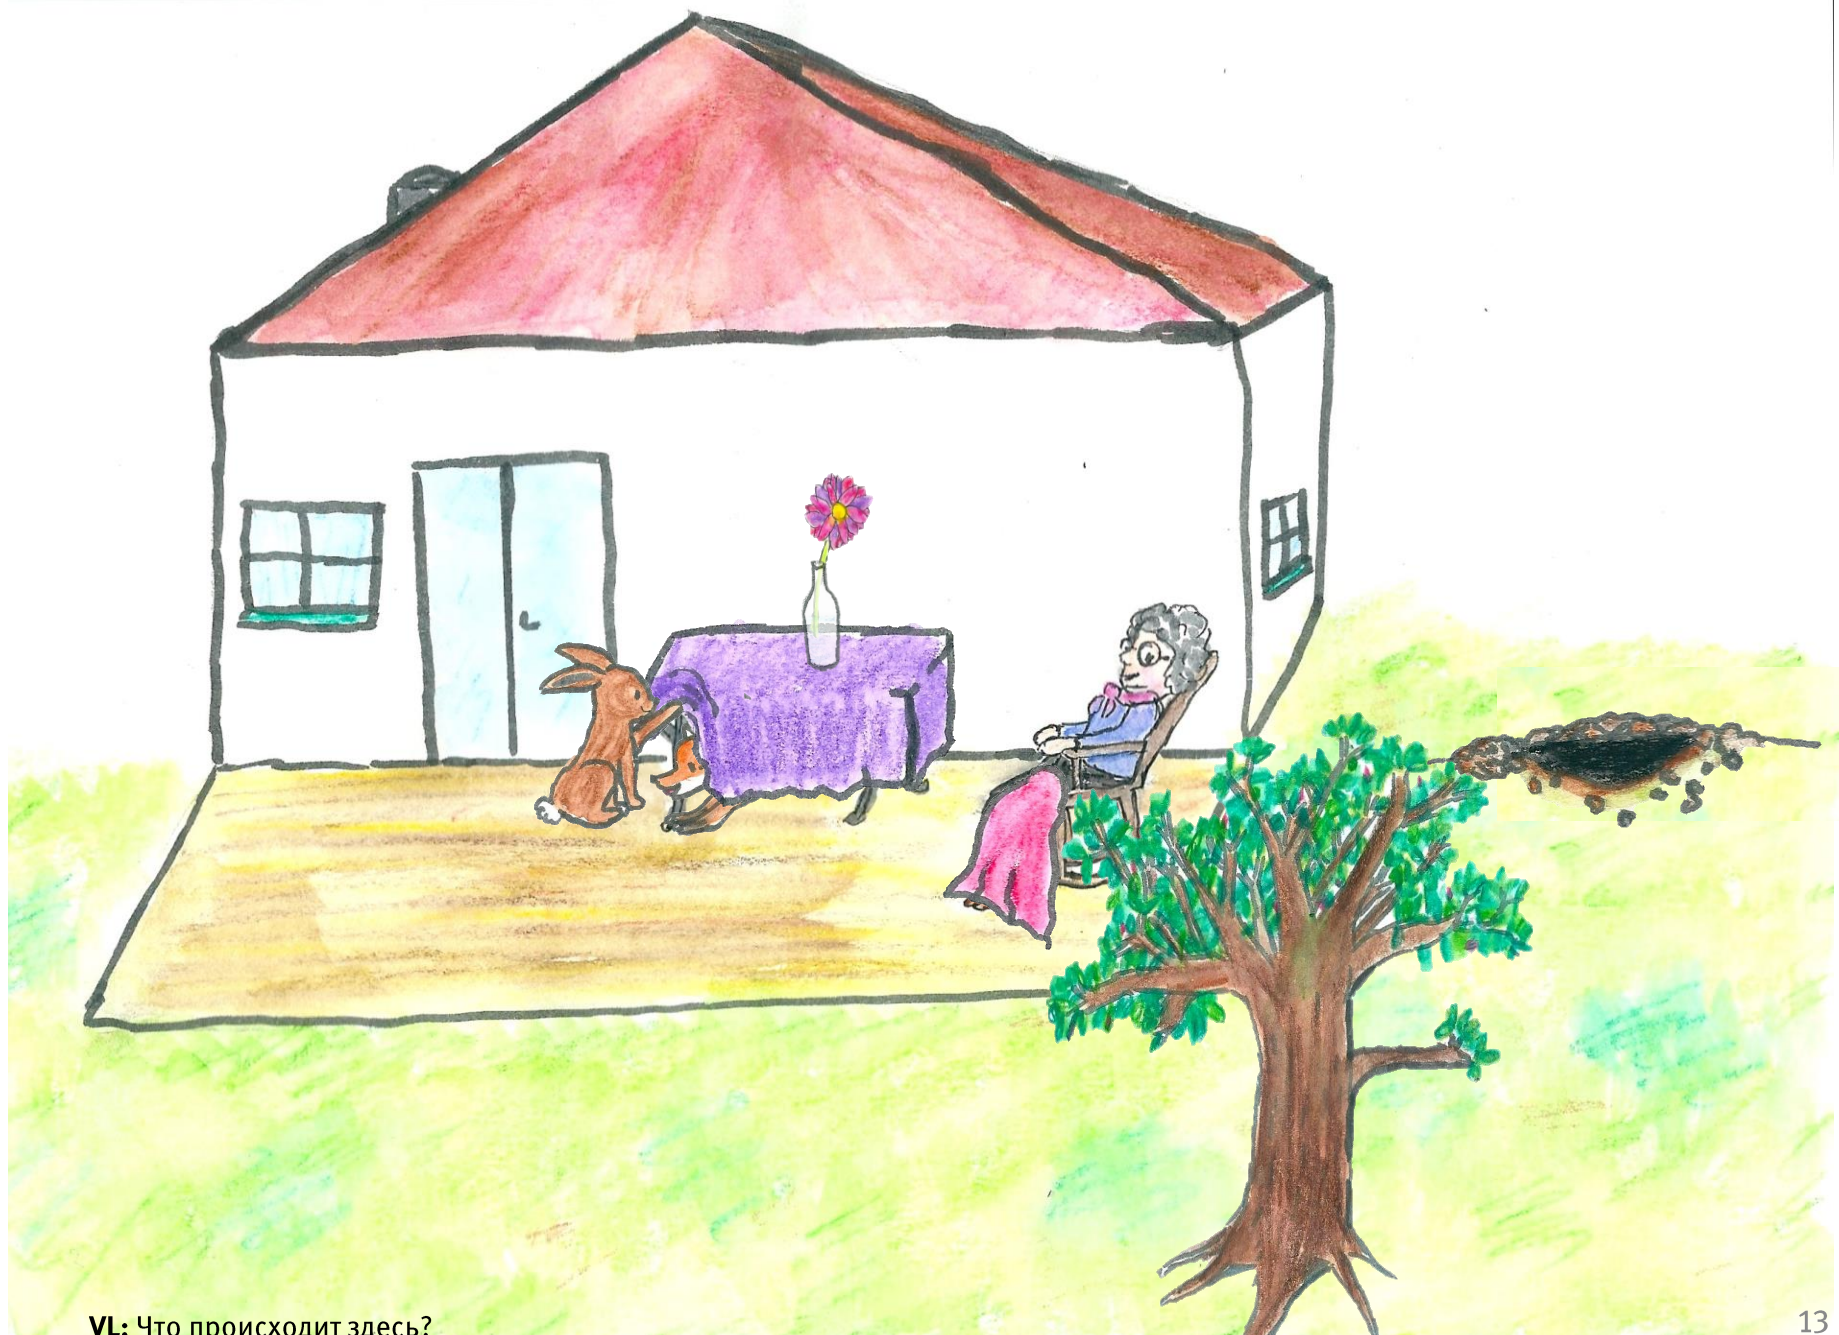

VL: Что происходит здесь?



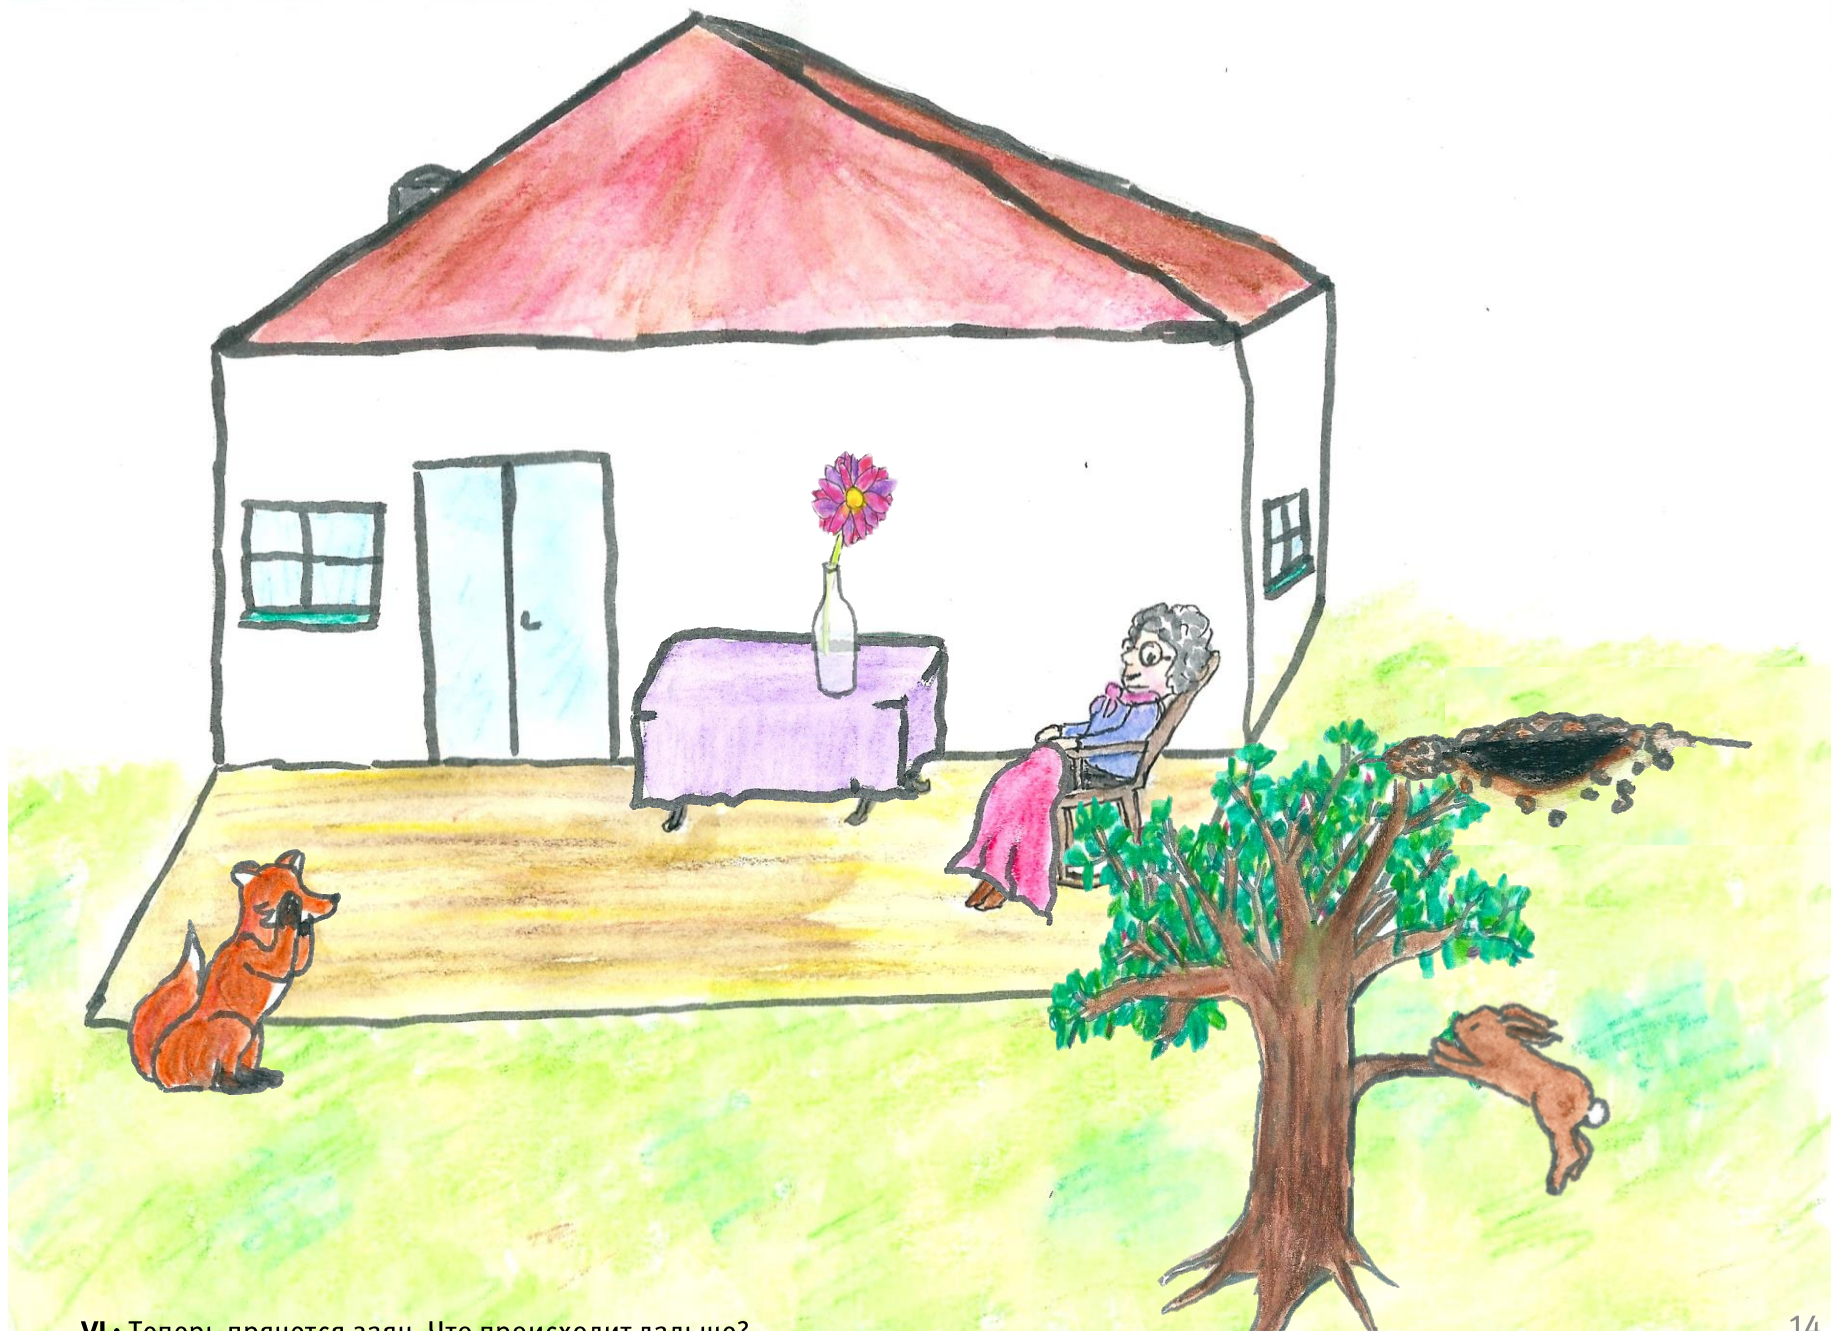

VL: Теперь прячется заяц. Что происходит дальше?



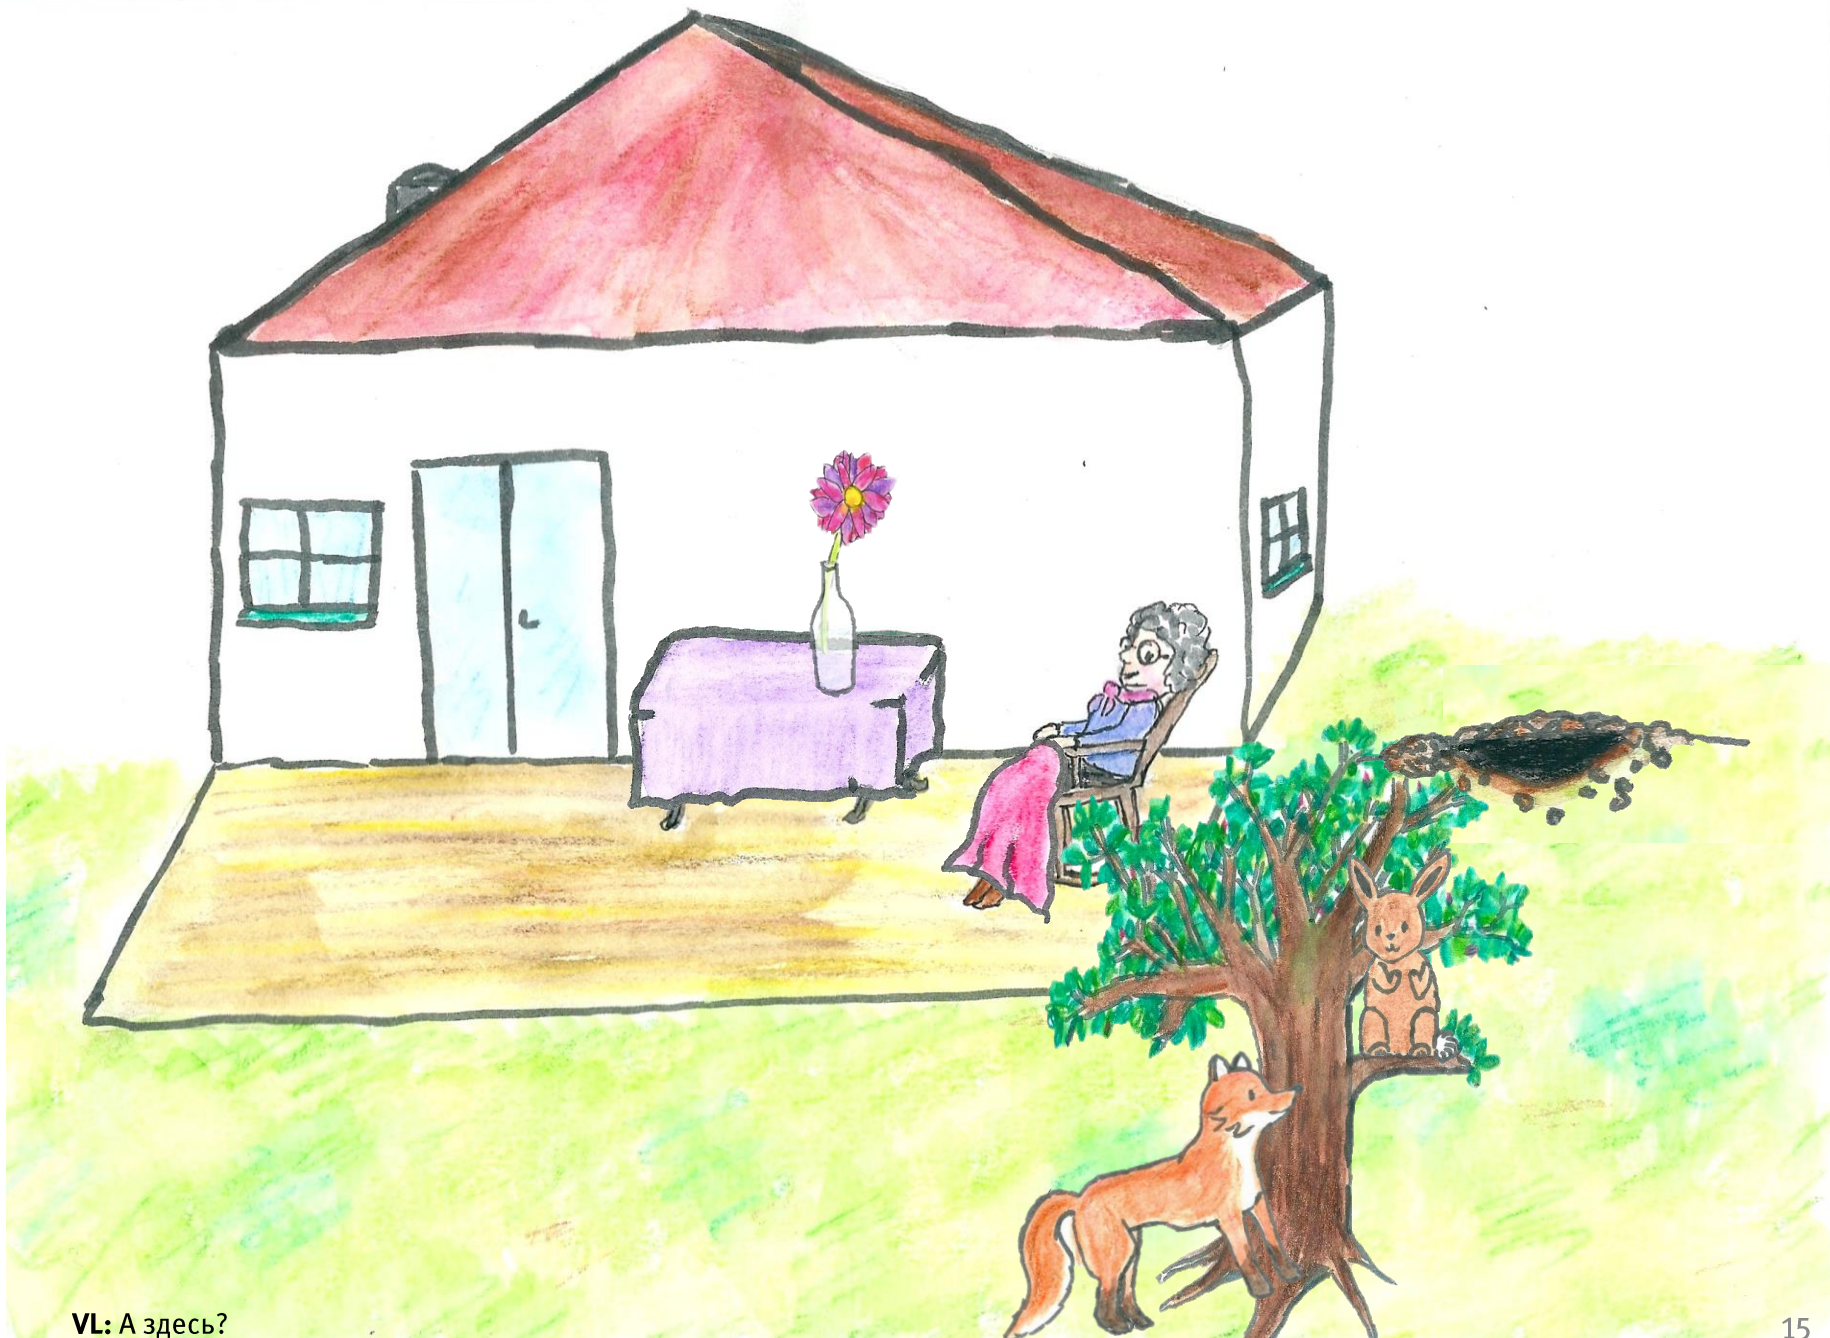

VL: А здесь?



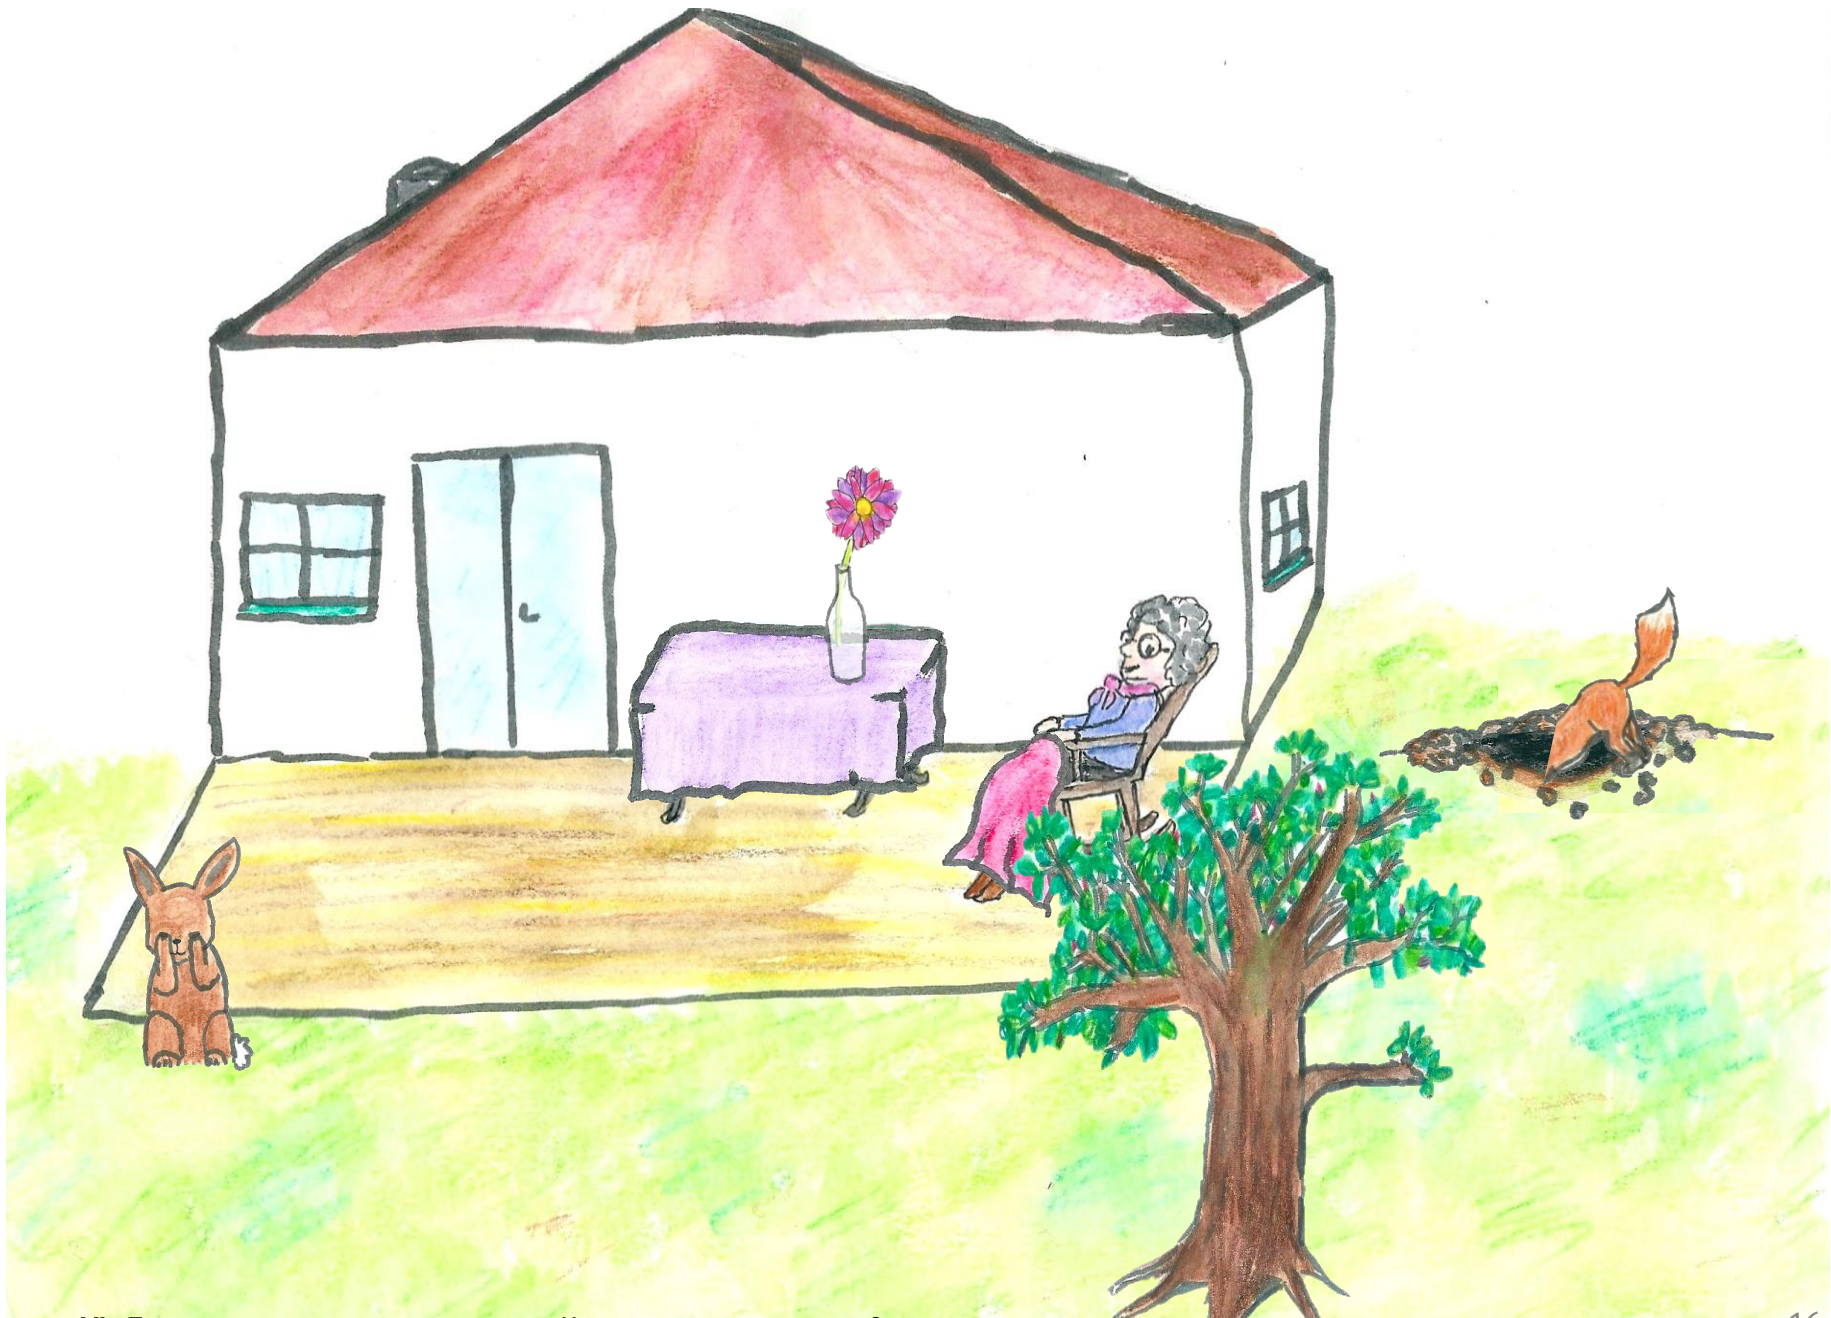

VL: Теперь очередь лисы прятаться. Что происходит дальше?



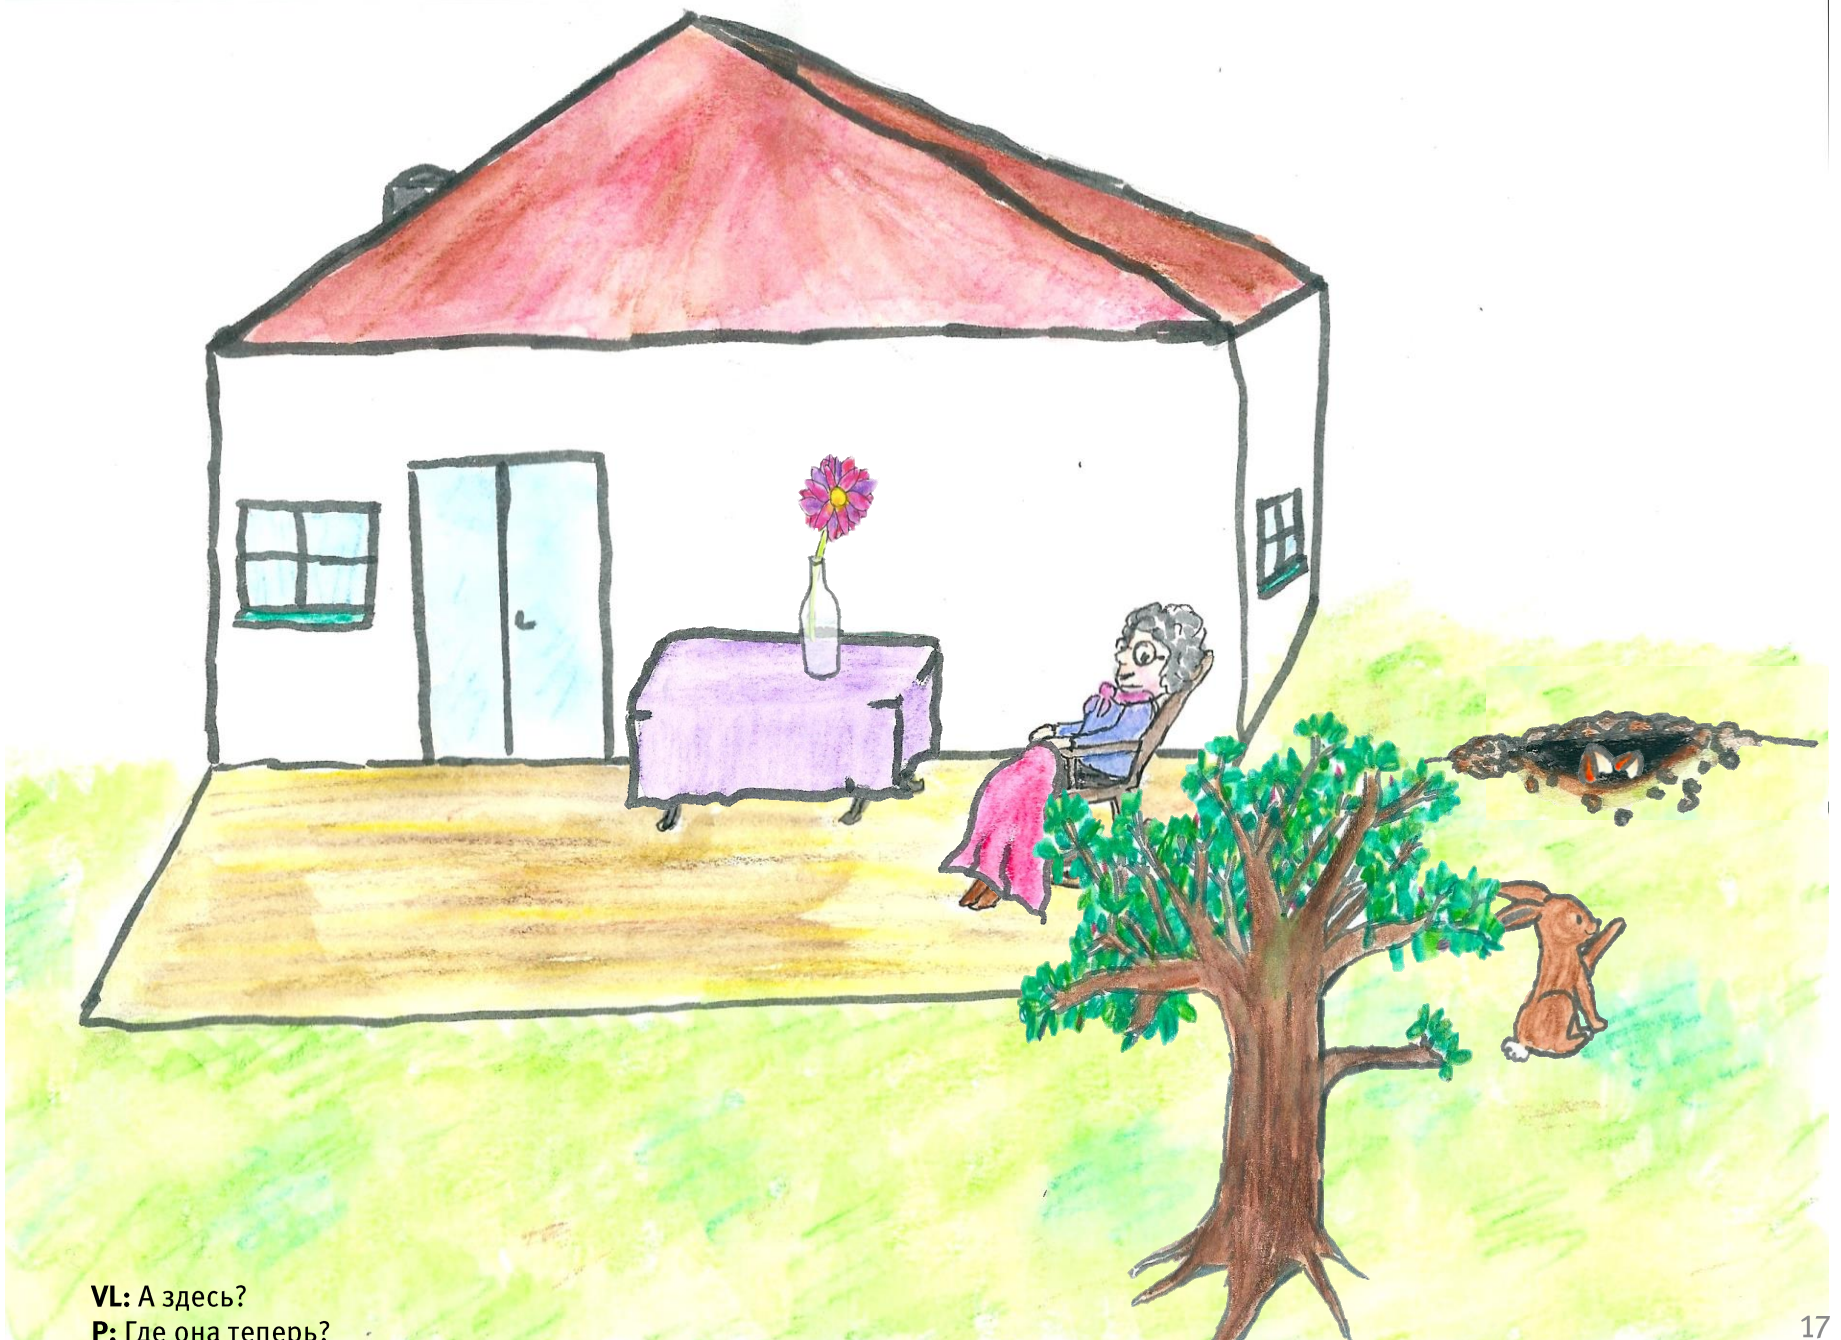

VL: А здесь?

P: Где она теперь?



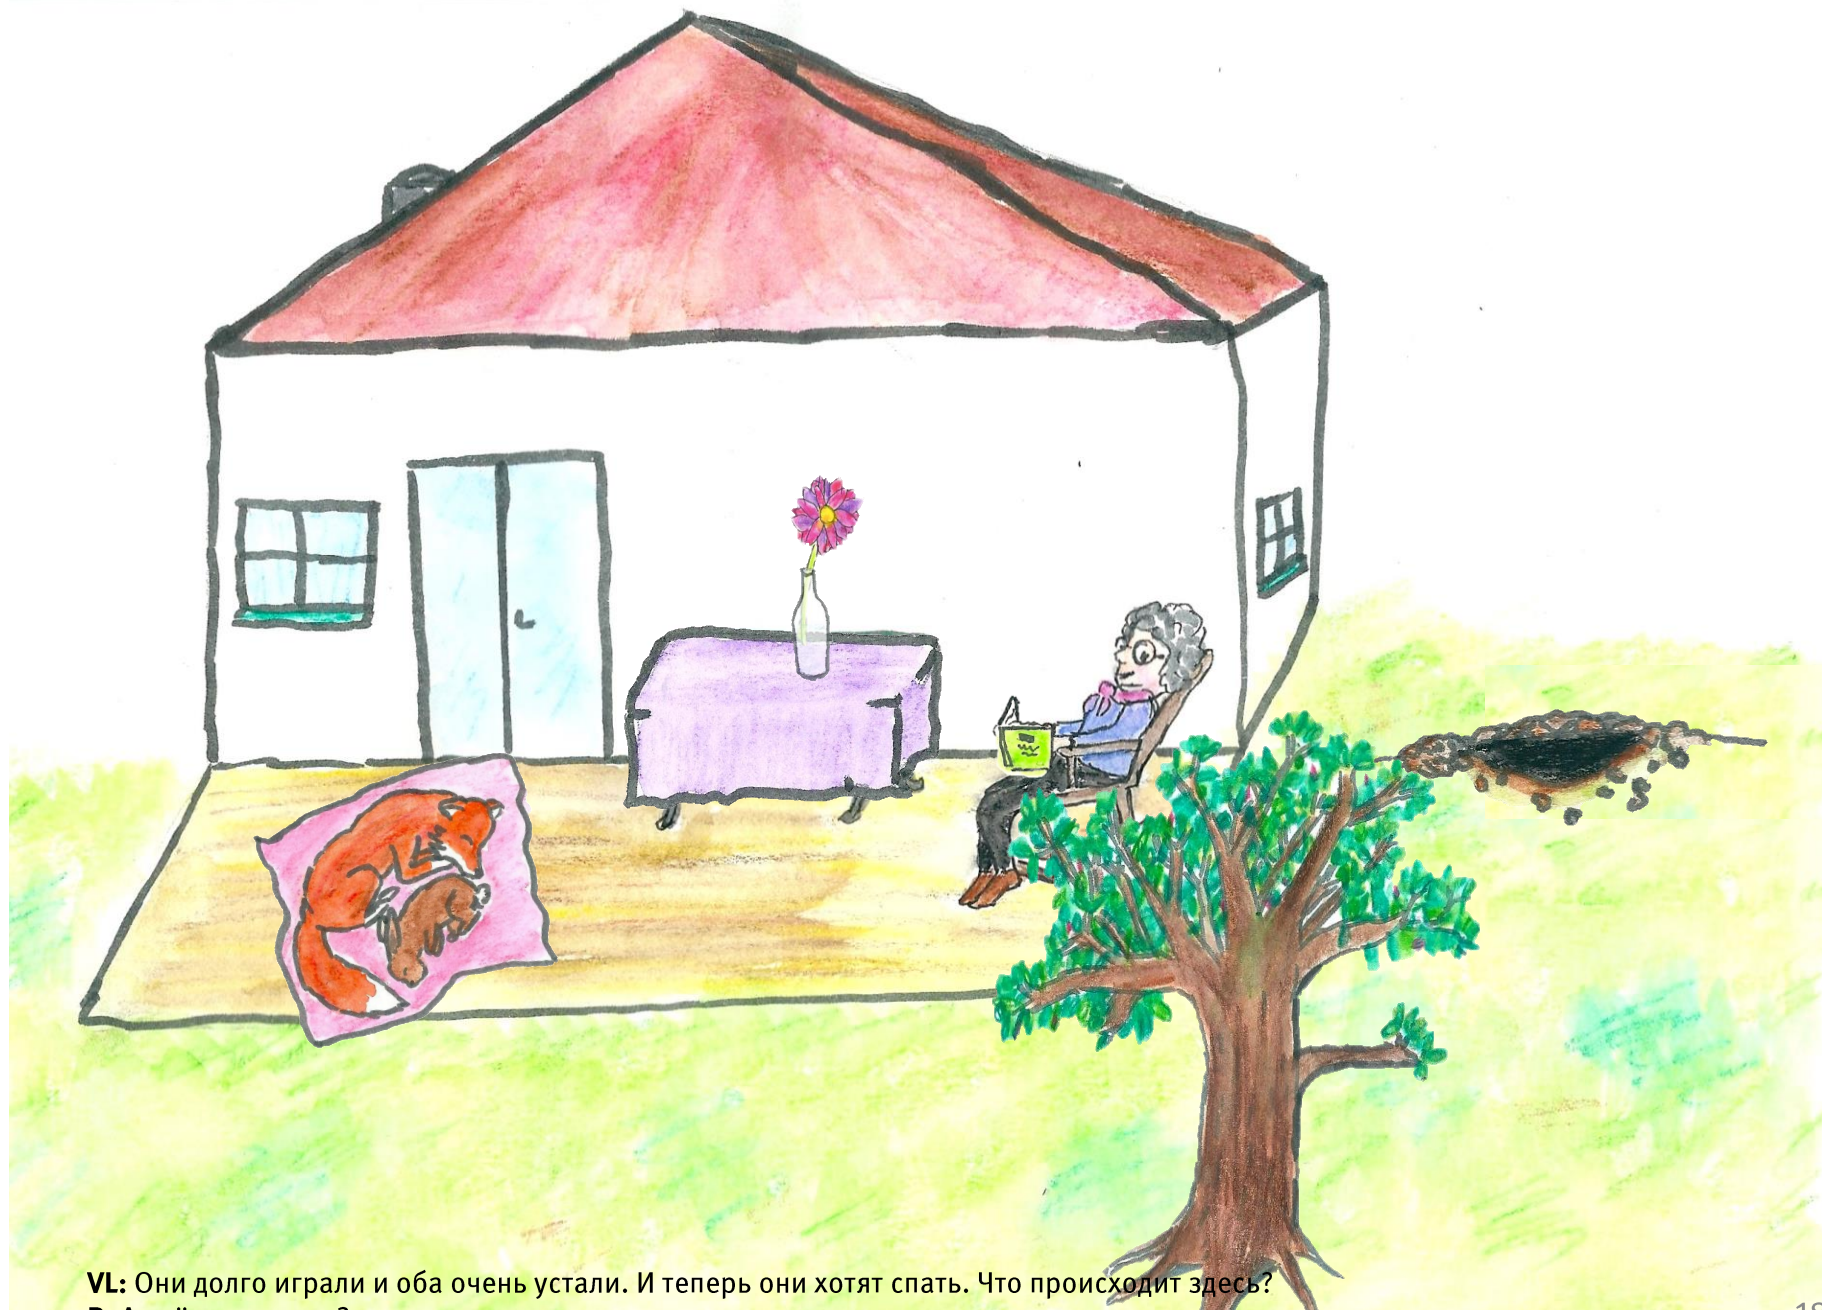

**VL:** Они долго играли и оба очень устали. И теперь они хотят спать. Что происходит здесь?

**Р:** А чьё это одеяло?
