# Supplementary material
Source: publisher site journal article supplement (https://www.degruyterbrill.com/publication/isbn/9783110645743/downloadAsset/9783110645743_Testmaterialien_KT-RUS.zip)

Вводные иллюстрации для проверки словаря (KT-RUS)  
,Eingangsblatt zur Überprüfung des Wortschatzes (KT-RUS)‘

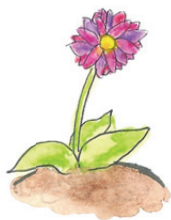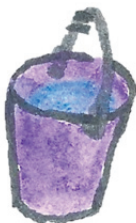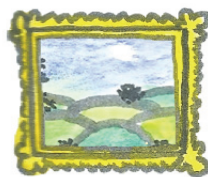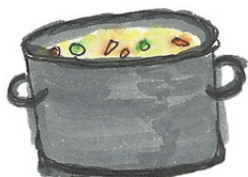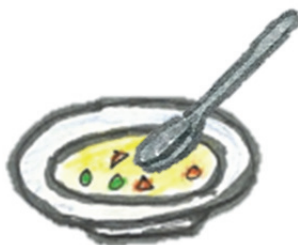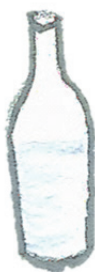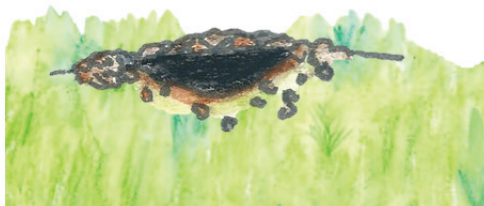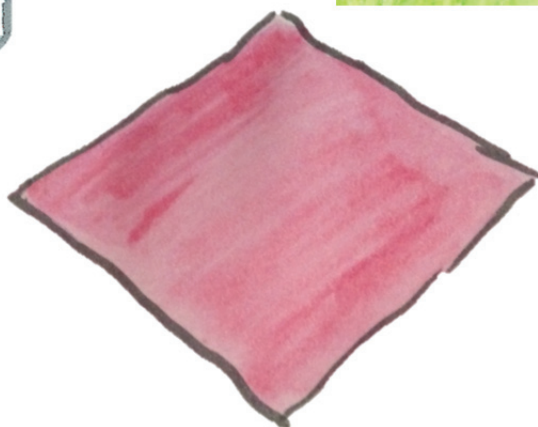

Supplement: Supplementary file 4 [file Werthmann_et_al_2020_KT-RUS_Eingangsblatt.pdf › Werthmann_KT-RUS/Werthmann_et_al_2020_KT-RUS_Eingangsblatt.pdf]
