# Supplementary material
Source: publisher site journal article supplement (https://www.degruyterbrill.com/publication/isbn/9783110645743/downloadAsset/9783110645743_Testmaterialien_KT-RUS.zip)
Supplement: Supplementary file 5 [file Werthmann_et_al_2020_KT-RUS_Testmanual_auf_rus.pdf › Werthmann_KT-RUS/Werthmann_et_al_2020_KT-RUS_Testmanual_auf_rus.pdf]

Антонина Вертманн, Наталья В. Гагарина, Катрин Линднер

# Тест по усвоению падежа для билингвальных детей дошкольного возраста: Русский язык (KT-RUS)

## Инструкция к тесту\*

Тип теста: Говорение

Метод тестирования: Элицитация

Цель теста: Тест проводится с целью оценки уровня владения русскими падежными формами (родительного, дательного, винительного, творительного и предложного падежей) в беспредложных и предложных конструкциях у двуязычных детей дошкольного возраста.

Инструментарий для теста:

- Инструкция к тесту
- 18 не переплетенных картинок\* об «Истории о лисе, которая хотела поиграть с зайцем» (иллюстрации Дженнифер Маттьё)
- Оценочный лист\*
- Вводные иллюстрации\* для проверки активного словаря, включающего слова: *цветок, ведро воды, картина, кастрюля, тарелка супа, ложка, бутылка, нора, одеяло*
- Плюшевая игрушка «Мишка» (или любая другая плюшевая игрушка)
- Звукозаписывающее устройство

---

**Антонина Вертманн**, Институт немецкого языка Ассоциации Лейбница (Мангейм, Германия), Университет Людвиг-Максимилиана (Мюнхен, Германия)

**Наталья В. Гагарина**, Центр Общего Языкознания Ассоциации Лейбница (Берлин, Германия)

**Катрин Линднер**, Университет Людвиг-Максимилиана (Мюнхен, Германия)

---

\* Руководство по тестированию на немецком языке, картинки к истории, оценочный лист (на русском и немецком языках) и вводные иллюстрации для проверки словаря выложены на сайте издательства по URL-адресу:  
<https://www.degruyter.com/view/product/543073>

# 1 Перед тестом

1. Перед проведением теста экспериментатор проверяет активный словарный запас ребенка с помощью листа с картинками.
2. Для повышения мотивации ребенка экспериментатор использует плюшевую игрушку, «Мишку», который очень любит слушать истории. Экспериментатор знакомит ребенка с ним перед проведением теста. При тестировании Мишка сидит напротив ребенка и иногда задает ему вопросы (см. главу 2.2).
3. Для элицитации фраз с падежными конструкциями экспериментатор использует три типа вопросов:
  - а) **Завершение предложений** (ЗП), напр.: *Лиса поливает...* (цветок, см. рис. 1–6). Этот метод используется только в первой части теста (с 1-ой по 6-ую картинку), чтобы привлечь внимание ребенка (сокр. *Риб.*) на употреблении падежных форм. Важно заметить, что при методе *завершения предложения* экспериментатор (сокр. *Эксп.*) несколько повышает интонацию к концу фразы перед словом, которое должно быть названо ребенком. Этим экспериментатор обращает внимание ребенка на то, что предложение еще не завершено и ребенок должен дополнить его сам.
  - б) **Открытые вопросы** (ОВ), требующие развернутого ответа, напр.: *Что здесь происходит?/Что происходит дальше?* Этот метод используется во второй части теста (с 7-ой по 18-ую картинку). Если ребенок только показывает на отдельные предметы (напр.: куда или где прячется лиса/заяц) или называет лишь указательные местоимения, такие как *там/туда/здесь*, то экспериментатор обращает внимание ребенка на то, что Мишка не видит, что происходит на картинке и не понимает *там/туда/здесь*; поэтому ребенок должен ему еще раз сказать, что происходит на картинке, напр.: «А Мишка не видит, что здесь на картинке, скажи ему еще раз, что здесь происходит?»
  - в) Для того чтобы получить требуемые ответы, в некоторых случаях Мишка (сокр. *М*) ставит уточняющие **вопросы с вопросительными словами** (ВВС), напр.: *кому, где, куда*. Три переспрашивания, которые помечены сокращением *Переспр.* (от «Переспрос»), ставит экспериментатор сам **только в том случае**, если после открытого вопроса ребенок **не назвал** нужной

конструкции. Вопросы с вопросительными словами ставятся ребенку только один раз и не повторяются.

В таблице ниже представлены типы вопросов и виды беспредложных (NP) и предложных (PP) конструкций, которые экспериментатор элицирует во время теста.

| Тип вопроса | Элицируемые конструкции                                                                                                      | Общее число конструкций |
|-------------|------------------------------------------------------------------------------------------------------------------------------|-------------------------|
| 12 ЗП       | 8 NP <sub>вин.п.</sub> , 2 NP <sub>род.п.</sub> , 1 PP <sub>вин.п.</sub> , 1 NP <sub>дат.п.</sub> ,<br>1 PP <sub>тв.п.</sub> | 13 конструкций          |
| 14 ОВ       | 8 NP <sub>вин.п.</sub> , 4 PP <sub>вин.п.</sub> , 3 PP <sub>пр.п.</sub> , 1 PP <sub>дат.п.</sub> ,<br>1 PP <sub>тв.п.</sub>  | 17 конструкций          |
| 6 ВВС       | 2 NP <sub>род.п.</sub> , 1 PP <sub>род.п.</sub> , 1 NP <sub>тв.п.</sub> , 1 PP <sub>тв.п.</sub> ,<br>1 PP <sub>пр.п.</sub>   | 6 конструкций           |

4. Критерий преждевременного прекращения тестирования: Тест прекращается, если с 9-ой картинке ребёнок никак не реагирует на два последовательных вопроса, поставленных экспериментатором, или говорит так неразборчиво, что его нельзя понять. В таком случае Мишка больше не задает вопрос: «А для кого цветок?» (см. рис. 9). Вместо этого экспериментатор показывает ребенку последнюю картинку и сам рассказывает, чем закончилась история.
5. С 7-ой картинке подлежащее, стоящее в начале предложения, может быть опущено, если его значение можно восстановить из текстуального или ситуативного контекста (ср., напр., Ружичка 1986)<sup>†</sup>. Такие подлежащие помечены квадратными скобками, напр.: [Она/Лиса] бежит в нору (см. рис. 16). Особенно при эликации открытыми вопросами опущение подлежащих облегчает ребенку формулировать свои высказывания.

<sup>†</sup> Ружичка, Рудольф (1986): Функционирование и классификация пустых категорий в русском литературном языке. *Zeitschrift für Slawistik* 31 (3), 388–392.

## 2 Проведение теста

### 2.1 Разминка

Разминка помогает экспериментатору вступить в разговор с ребенком, взбодрить его, если это необходимо, и настроить на выполнение задания. Этого можно достичь путем комментариев об одежде ребенка, о его занятиях сегодня в саду или постановкой продуманных вопросов, напр.: «Ты любишь слушать/рассказывать истории?!» или «Какие истории ты любишь больше всего?»

### 2.2 Введение в историю

Экспериментатор говорит ребенку: *«Давай мы с тобой вместе просмотрим историю в картинках. Эта история о том, как лиса хотела поиграть с зайцем. Они будут не только играть, но и делать другие важные дела. Посмотри сюда, знаешь ли ты все предметы на этой картинке?»* Экспериментатор показывает ребенку вводные иллюстрации с различными предметами из истории и проверяет знание активного словаря. Экспериментатор продолжает: *«Ты наверняка их знаешь. Кто/Что это?»* Если ребёнок затрудняется самостоятельно назвать предмет, то экспериментатор сам произносит слово и просит ребенка повторить его.

После того как все слова названы, экспериментатор говорит: *«А теперь, (Имя ребенка), смотри, я тебе покажу Мишку. Он очень любит слушать истории, поэтому давай расскажем ему одну. Расскажи историю громко и четко, так, чтобы Мишка мог понять, что в ней происходит. А ты, Мишка (обращается к игрушке), сиди здесь и слушай!»*

После этого экспериментатор кладет перед ребенком 18 картинок, сложенных стопкой. После описания первой картинке экспериментатор кладет её слева от стопки так, чтобы ребёнок мог видеть одновременно две картинки: 1-ую и 2-ую. После описания второй картинке экспериментатор кладет ее на первую так, чтобы перед ребёнком снова лежали две картинки: 2-ая и 3-ья и т. д.

## 2.3 Рассказ истории по картинкам

### KT-RUS, часть 1-ая

С 1-ой по 18-ую картинку (включительно) под репликой ребёнка в круглых скобках «( )» приведены примеры ожидаемых ответов на вопросы экспериментатора. 

С 1-ой по 6-ую картинку экспериментатор дает ребенку готовые конструкции, которые ребенок должен закончить, добавив существительное в правильном падеже. Этим он проверяет, знает ли ребенок нужные конструкции.

Экспериментатор начинает историю:

**Эксп.:** Что здесь происходит? (Короткая пауза.) Это лиса, она видит...  
(Экспериментатор показывает на зайца.)

**Реб.:** ...NP<sub>вин.п.</sub> (напр.: зайца/зайчика).

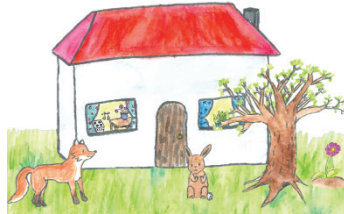

Рис. 1

**Эксп.:** Заяц боится лисы. Он убегает. Лиса кричит ему: «Куда ты убегаешь?» – Как ты думаешь, что хочет лиса от зайца? Она хочет поиграть...  
(При этом экспериментатор показывает на зайца.)

**Реб.:** ...PP<sub>тв.п.</sub> (напр.: с зайцем/с ним).

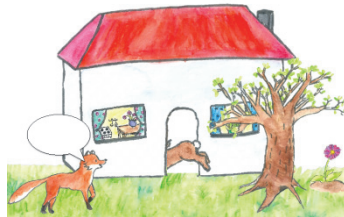

Рис. 2

**Эксп.:** Заяц говорит: «У меня нет времени, очень много дел. Мне надо принести...»

(При этом экспериментатор показывает на соответствующие выноски.)

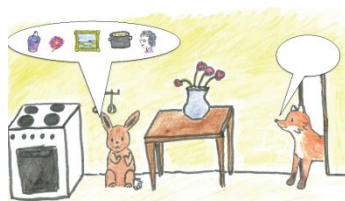

**Реб.:** ... *NP*<sub>род.п./NP</sub><sub>вин.п.</sub> (напр.: воды/воду/ведро воды).

**Эксп.:** «Мне надо полить...»

**Реб.:** ... *NP*<sub>вин.п.</sub> (напр.: цветок).

**Эксп.:** «Мне надо повесить...»

**Реб.:** ... *NP*<sub>вин.п.</sub> (напр.: картину).

**Эксп.:** «Потом мне надо сварить...»

**Реб.:** ... *NP*<sub>вин.п.</sub> (напр.: суп)

**Эксп.:** «и навестить...»

**Реб.:** ... *NP*<sub>вин.п.</sub> (напр.: бабушку).

**Эксп.:** Заяц говорит лисе: «Если ты мне поможешь, то потом мы вместе поиграем в прятки». Лиса отвечает: «Я помогу...»

**Реб.:** ... *NP*<sub>дат.п.</sub> (напр.: тебе/зайцу).

Рис. 3

**Эксп.:** Что происходит здесь? Лиса несёт...

**Реб.:** ... *NP*<sub>вин.п.</sub> (+ *NP*<sub>род.п.</sub>) (напр.: ведро воды).

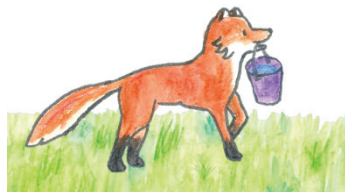

Рис. 4

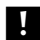

Если ребёнок дополняет только слово *ведро* или *воду* (см. рис. 4), то:

**Эксп.:** (Она только ведро несёт?) Лиса несёт ведро...

**Реб.:** ... *NP*<sub>род.п.</sub> (напр.: воды).

**Эксп.:** Давай посмотрим, что же дальше происходит: Лиса поливает...

**Реб.:** ...*НР<sub>вин.п.</sub>* (напр.: цветок/дерево/цветок и дерево).

**М:** А где растёт цветок?

**Реб.:** *РР<sub>тв.п./пр.п.</sub>* (напр.: под/рядом с деревом/на земле).

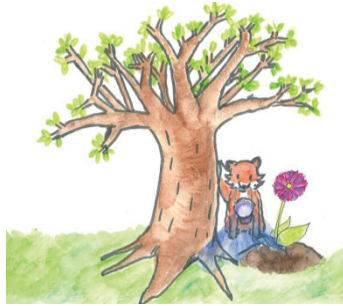

Рис. 5

**Эксп.:** А здесь? Заяц вешает...

**Реб.:** ...*НР<sub>вин.п.</sub>* + *РР<sub>вин.п.</sub>* (напр.: картину/картину на стену).

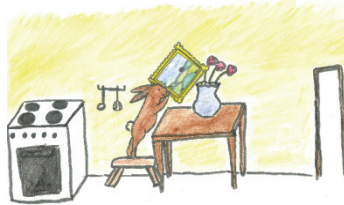

Рис. 6

---

Если ребёнок дополняет только слово *картину* (см. рис. 6), то:

**М:** А куда он вешает картину?

**Реб.:** *РР<sub>вин.п.</sub>* (напр.: *на стену*).

---

## KT-RUS, часть 2-ая:

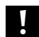

С 7-ой картинки экспериментатор больше не задаёт готовых конструкций для завершения предложений! Если ребенок не отвечает на поставленные открытые вопросы или говорит «Не знаю...», то экспериментатор сам описывает содержание картинки.

Если с 9-ой картинки ребёнок никак не реагирует на два последовательных вопроса, поставленных экспериментатором, или говорит так неразборчиво, что его нельзя понять, то тестирование прекращается (см. *Критерий преждевременного прекращения тестирования*, гл. 1).

**Эксп.:** Что здесь происходит?

**Реб.:** [Заяц] варит  $NP_{\text{вин.п.}}$  (напр.: суп/кашу).

**Эксп.:** Тем временем лиса проголодалась.  
Что происходит дальше?  
(Экспериментатор показывает на тарелку.)

**Реб.:** Лиса несет  $NP_{\text{вин.п.}}/PP_{\text{тв.п.}}$  (напр.: тарелку/идет с тарелкой).

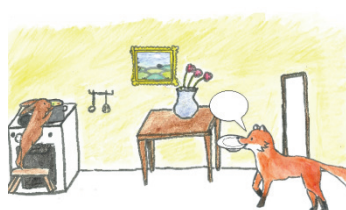

Рис. 7

**Эксп.:** Как ты думаешь, что она просит у зайца поесть?

**Реб.:** [Она] просит  $NP_{\text{род.п./вин.п.}}$  (напр.: супа/суп/каши/кашу).

**Эксп.:** А здесь?

**Реб.:** [Лиса] ест  $NP_{\text{вин.п.}}$  (напр.: суп/кашу).

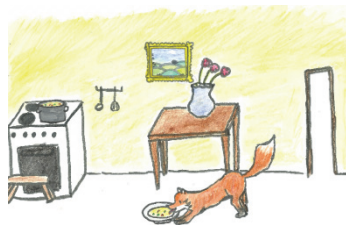

Рис. 8



**Эксп.:** Что здесь происходит?

**Реб.:** Они/заяц и лиса идут РР<sub>дат.п.</sub> (напр.: к бабушке).

**Эксп.:** Но они не просто так идут, несут они подарки?

**Реб.:** Да, заяц несет НР<sub>вин.п.</sub> (+ РР<sub>тв.п.</sub>) (напр.: кастрюлю/суп/кастрюлю с супом), а лиса несет НР<sub>вин.п.</sub> (напр.: цветок).

**М:** А для кого цветок?

**Реб.:** РР<sub>род.п.</sub> (напр.: для бабушки).

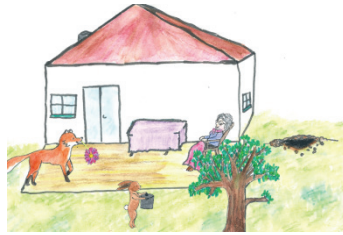

Рис. 9

**Эксп.:** Что здесь происходит?

**Реб.:** [Бабушка] ставит НР<sub>вин.п.</sub> + РР<sub>вин.п.</sub> (напр.: цветок в бутылку/в вазу).

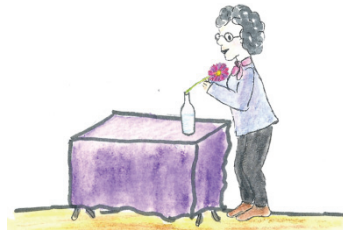

Рис. 10

**Эксп.:** Бабушка проголодалась и хочет есть. Что здесь происходит?

**Реб.:** Она ест НР<sub>вин.п.</sub> (напр.: суп).

**М:** А чем ест бабушка суп?

**Реб.:** НР<sub>тв.п.</sub> (напр.: ложкой).

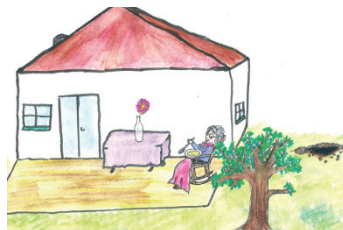

Рис. 11

**Эксп.:** Потом заяц говорит лисе: «Ты мне очень хорошо помогла. Теперь мы можем поиграть в прятки! Ты прячешься первой!» Что происходит дальше?

**Реб.:** [Лиса] бежит РР<sub>вин.п.</sub> (напр.: под стол).

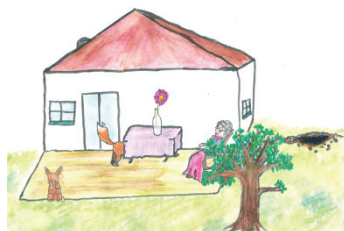

Рис. 12

**Эксп.:** Что происходит здесь?

**Реб.:** Лиса прячется РР<sub>тв.п./вин.п.</sub> (напр.: под столом/под стол).

**Переспр.:** Где заяц находит лису?/А где лиса?

**Реб.:** РР<sub>тв.п.</sub> (напр.: под столом).

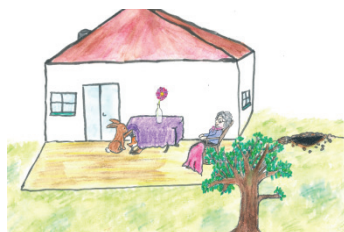

Рис. 13

**Эксп.:** Теперь прячется заяц. Что происходит дальше?

**Реб.:** Заяц запрыгивает РР<sub>вин.п.</sub> (напр.: на дерево).

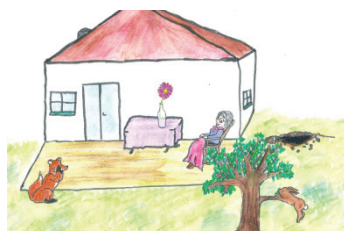

Рис. 14

**Эксп.:** А здесь?

**Реб.:** Лиса находит НР<sub>вин.п.</sub> + РР<sub>пр.п.</sub> (напр.: зайца на дереве).

**Переспр.:** Где лиса находит зайца?

**Реб.:** РР<sub>пр.п.</sub> (напр.: на дереве).

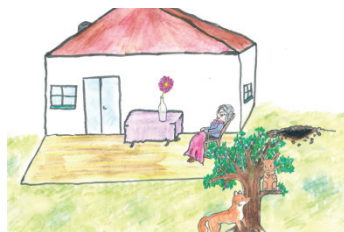

Рис. 15

**Эксп.:** Теперь очередь лисы прятаться. Что происходит дальше?

**Реб.:** [Она/Лиса] бежит РР<sub>вин.п.</sub> (напр.: в нору).

**Переспр.:** Куда бежит лиса?

**Реб.:** РР<sub>вин.п.</sub> (напр.: в нору).

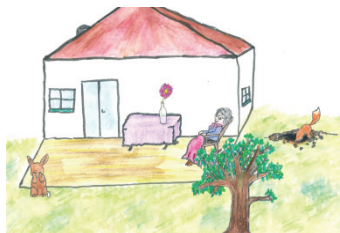

Рис. 16

**Эксп.:** А здесь?

**Реб.:** Лиса прячется РР<sub>пр.п.</sub>/Заяц находит лису РР<sub>пр.п.</sub> (напр.: в норе).

**М:** Где она теперь?

**Реб.:** РР<sub>пр.п.</sub> (напр.: в норе).

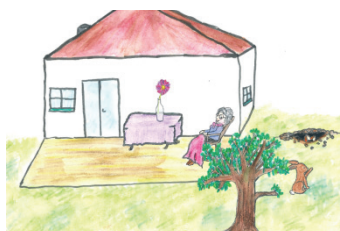

Рис. 17

**Эксп.:** Они долго играли и оба очень устали. И теперь они хотят спать. Что происходит здесь?

**Реб.:** Они спят РР<sub>пр.п.</sub> (напр.: на одеяле).

**М:** А чьё это одеяло?

**Реб.:** Это одеяло NR<sub>род.п.</sub> (напр.: бабушки).

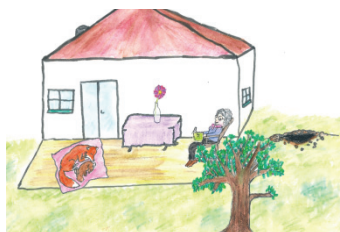

Рис. 18

### 3 После теста

После выполнения теста экспериментатор хвалит ребенка за его старание и интересно рассказанную историю.

**Благодарность:**

Тест был разработан в рамках проекта «Verbale und nonverbale Indikatoren zur Identifizierung von umschriebenen Sprachentwicklungsstörungen bei sukzessiv bilingualen Kindergartenkindern» (под руководством д-ра филол. наук Натальи В. Гагариной – Az. GA 1424/2-1 – и д-ра филол. наук Катрин Линднер – Az. LI 410/5-1), финансируемого Немецким научно-исследовательским обществом (DFG, Deutsche Forschungsgesellschaft). В лонгитюдном исследовании с тремя повторяющимися измерениями приняли участие 86 детей. Авторы выражают искреннюю признательность всем сотрудникам проекта за оказанную поддержку.
